1 Investigation of singlet oxygen sensitive genes in the cyanobacterium  
2 *Synechocystis* PCC 6803

3

4 Gábor Patyi<sup>1,2</sup>, Barbara Hódi<sup>1,2</sup>, Ivy Mallick<sup>1</sup>, Gergely Maróti<sup>1</sup>, Péter B. Kós<sup>1,3\*</sup> and Imre  
5 Vass<sup>1\*</sup>

6

7 <sup>1</sup>Institute of Plant Biology, Biological Research Centre of the Eötvös Lóránd Research  
8 Network, Szeged, Hungary

9 <sup>2</sup>Faculty of Science and Informatics, Doctoral School in Biology, University of Szeged,  
10 Szeged, Hungary

11 <sup>3</sup>Department of Biotechnology, Faculty of Science and Informatics, University of Szeged,  
12 Hungary

13

14 \* Corresponding authors

15 E-mail: [vass.imre@brc.hu](mailto:vass.imre@brc.hu) (IV), [kos.peter@brc.hu](mailto:kos.peter@brc.hu) (PBK)

16

17

18 Word counts: Introduction (555), Materials and Methods (675), Results (2058), Discussion  
19 (3194)

20        **Abbreviations**

21        Chl, Chlorophyll

22        BChl, bacteriochlorophyll

23        HL, high light

24        HLIP, high-light-inducible protein

25        LL, low light

26        MB, Methylene blue

27         $^1\text{O}_2$ , Singlet oxygen

28        PSII, Photosystem II

29        qPCR, quantitative PCR

30        RB, Rose Bengal

31        SCP, Small chlorophyll binding protein

32

33

34 **Summary**

35 Singlet oxygen ( $^1\text{O}_2$ ) is an important reactive oxygen species whose formation by the  
36 type-II, light-dependent, photodynamic reaction is inevitable during photosynthetic processes.  
37 In the last decades, the recognition that  $^1\text{O}_2$  is not only a damaging agent, but can also affect  
38 gene expression and participates in signal transduction pathways has received increasing  
39 attention. However, contrary to several other taxa,  $^1\text{O}_2$ -specific genes have not been identified  
40 in the important cyanobacterial model organism *Synechocystis* PCC 6803. By using global  
41 transcript analysis we have identified a large set of  $^1\text{O}_2$ -responsive *Synechocystis* genes,  
42 whose transcript levels were either enhanced or repressed in the presence of  $^1\text{O}_2$ .  
43 Characteristic  $^1\text{O}_2$  responses were observed in several light-inducible genes of *Synechocystis*,  
44 especially in the *hli* (or *scp*) family encoding HLIP/SCP proteins involved in photoprotection.  
45 Other important  $^1\text{O}_2$ -induced genes include components of the Photosystem II repair  
46 machinery (*psbA2* and *ftsH2*, *ftsH3*), iron homeostasis genes *isiA* and *idiA*, the Group-2 sigma  
47 factor *sigD*, some components of the transcriptomes induced by salt-, hyperosmotic and cold-  
48 stress, as well as several genes of unknown function. One of the most pronounced  $^1\text{O}_2$ -  
49 induced upregulation was observed for the *hliB* gene, whose deletion provided tolerance  
50 against  $^1\text{O}_2$ -mediated light damage. A bioreporter *Synechocystis* strain was created by fusing  
51 the *hliB* promoter to the bacterial luciferase (*lux*), which showed its utility for continuous  
52 monitoring of  $^1\text{O}_2$  concentrations inside the cell.

53

54 **Keywords:**

55 *Synechocystis* PCC 6803, singlet oxygen, singlet oxygen bioreporter, gene induction, *hliB*

56

## 57 **Introduction**

58 Singlet oxygen ( $^1\text{O}_2$ ) is an extremely important reactive oxygen species (ROS) with a  
59 high oxidative capacity. It can participate in diverse intracellular processes, damaging  
60 macromolecules, oxidizing proteins, fatty acids, and nucleotides (Krieger-Liszkay, 2005)(Di  
61 Mascio *et al.*, 2019; Pospíšil *et al.*, 2022), inducing adverse effects on cells. One of its most  
62 significant physiological effect in the photosynthetic apparatus is the damage of the structure  
63 and function of the Photosystem II (PSII) reaction centre under high light exposure (Okada *et al.*,  
64 1996; Mizusawa *et al.*, 2003; Krieger-Liszkay, 2005; Krieger-Liszkay *et al.*, 2008;  
65 Rehman *et al.*, 2013; Bashir *et al.*, 2021).

66 The reactive nature of  $^1\text{O}_2$  not only causes damage to various cell constituents, but can  
67 also induce changes in gene expression. In the green alga *Chlamydomonas reinhardtii* and  
68 higher plants it has been demonstrated that  $^1\text{O}_2$  acts as a signaling molecule that transmits  
69 information from chloroplasts to the nucleus, regulating the expression of nuclear genes  
70 (Fischer *et al.*, 2007; Wang *et al.*, 2016; Dmitrieva *et al.*, 2020).  $^1\text{O}_2$ -mediated activation of  
71 genes involved in the molecular defense response against photooxidative stress has been  
72 reported in various organisms (Leisinger *et al.*, 2001; Op Den Camp *et al.*, 2003; Berghoff *et al.*,  
73 2011). Leisinger *et al.* showed that in the presence of the external photosensitizer Rose  
74 bengal (RB) the glutathione peroxidase (*gpxh*) homologous gene of *Chlamydomonas* is  
75 transcriptionally activated by  $^1\text{O}_2$ , whereas *gpxh* mRNA levels are only weakly increased by  
76  $\text{O}_2^{\bullet-}$  or peroxide (Leisinger *et al.*, 2001). Op den Camp *et al.* used the *Arabidopsis* flu mutant  
77 to demonstrate that  $^1\text{O}_2$  formed as a result of protochlorophyll accumulation rapidly activated  
78 many (70) genes (Op Den Camp *et al.*, 2003). In contrast, other ROS, such as  $\text{O}_2^{\bullet-}$ , did not  
79 affect the expression of these genes during the early stress response. Among photosynthetic  
80 prokaryotes gene level responses to  $^1\text{O}_2$  have been investigated only in the case of the  
81 phototrophic alpha-proteobacterium *Cereibacter sphaeroides* (old name: *Rhodobacter*  
82 *sphaeroides*) (Glaeser *et al.*, 2011). Information on this important topic in the case of the  
83 widely used model cyanobacterium *Synechocystis* PCC 6803 is completely missing.

84 Investigation of signaling processes mediated by  $^1\text{O}_2$  inside cells requires methods that  
85 are suitable for  $^1\text{O}_2$  detection in the intracellular environment. However, the available  
86 methods, such as EPR spin trapping by TEMP (Hideg *et al.*, 1994; Fufezan *et al.*, 2007) or

87 TEMPD-HCl (Leisinger *et al.*, 2001; Ferretti *et al.*, 2018), direct 1270 nm luminescence  
88 detection (Tomo *et al.*, 2012), fluorescent spin traps, DanePy (Hideg *et al.*, 2007) and SOSG  
89 (Flors *et al.*, 2006; Bashir *et al.*, 2021) are not suitable for continuous detection of  
90 intracellular  $^1\text{O}_2$  levels. The use of cyanobacterial bioreporters can provide a solution for this  
91 problem (Patyi *et al.*, 2021), for which the identification of specific  $^1\text{O}_2$ -responsive genes is  
92 indispensable.

93 In the present work we identified genes in *Synechocystis* whose expression was  
94 specifically upregulated or suppressed in the presence of  $^1\text{O}_2$  generated from either  
95 endogenous or exogenous sources. One of the most promising  $^1\text{O}_2$ -specific genes is the high  
96 light inducible *hliB* whose expression level is upregulated ca. 50-fold by  $^1\text{O}_2$ . Deletion of this  
97 gene enhanced  $^1\text{O}_2$ -dependent light sensitivity of *Synechocystis*, demonstrating the  
98 involvement of the HliB protein in protection against  $^1\text{O}_2$ -mediated photodamage. By using a  
99 fusion of the *hliB* promoter and the bacterial luciferase gene we created a  $^1\text{O}_2$  bioreporter  
100 construct, which allows detection of  $^1\text{O}_2$  production inside the cyanobacterial cells.

101

102

## 103 **Materials and Methods**

### 104 ***Strains, growth conditions***

105 *Synechocystis* PPC 6803 (*Synechocystis*) cells were grown photoautotrophically in the  
106 presence of 3%  $\text{CO}_2$ ,  $40 \mu\text{mol photon m}^{-2} \text{s}^{-1}$  white light intensity and  $30^\circ\text{C}$  in BG-11  
107 (Rippka *et al.*, 1979) as described earlier (Patyi *et al.*, 2021).

108 *Escherichia coli* strain *DH5 $\alpha$* , used for routine DNA manipulations (Kirtania *et al.*,  
109 2019) and constructions, was grown in Luria broth (LB) medium at  $37^\circ\text{C}$  (J. Sambrook, D.W.  
110 Russell, 2001).

### 111 ***Measurement of growth***

112 The differences in growth rates caused by  $^1\text{O}_2$ , produced by either  $0.5 \mu\text{M}$  Methylene  
113 Blue (MB) or Rose Bengal (RB), were assessed by following the optical density at 680 nm for  
114 4 days in a Photo Multi Cultivator MC-1000 (Photon Systems Instrument) with automatic OD  
115 measurements in every hour.

## 116 ***Gene expression studies***

117 *Synechocystis* cDNA libraries were prepared for whole transcriptome sequencing from  
118 0.5 µg of total RNA using the NEBNext rRNA depletion Kit for Bacteria #E7850, #E7860  
119 (Biolabs). Paired end sequencing was performed using the Illumina NextSeq platform with  
120 the NextSeq 500/550 High Output Kit v2.5 (75 Cycles) resulting in 306611978 reads  
121 altogether (10M reads per sample). Trimming, quality clipping, gene identification and  
122 downstream calculations were carried out in CLC Genomics Workbench 20.0 (QIAGEN).  
123 The *Synechocystis* genome sequence NC\_000911 downloaded from NCBI was used as  
124 template for mapping the reads to genes. Gene abundances were calculated in RPKM (Reads  
125 Per Kilobase Million). For comparative study,  $\log_2$  fold changes and  $p$  values were calculated  
126 as well as *Max group means* were established for each gene. (For each group in the statistical  
127 comparison, the average RPKM is calculated. *Max group means* is the maximum of the  
128 average RPKM's.)

129 To verify transcript abundances, the same total RNA samples were used as for total  
130 transcriptome sequencing. cDNA was synthesized using the RevertAid RT Kit (ThermoFisher  
131 Scientific) and used as template in quantitative PCR (qPCR) using 5X HOT FIREPol  
132 EvaGreen qPCR Mix Plus (Solis BioDyne) in the CFX384 Touch Real-Time PCR Detection  
133 System. The  $\Delta\Delta C_T$  method was used for calculating changes of gene expression using *rrn16S*  
134 as internal control.

135

## 136 ***Construction of the $\Delta hliB$ strain***

137 We constructed a  $\Delta hliB$  mutant by replacing the *hliB* (*ssr2595*) gene with a  
138 spectinomycin cassette (Omega cassette). For creating the insert of a pUC19 vector, the  
139 spectinomycin cassette HindIII/BamHI fragment from the vector pND6LuxAB (Peca *et al.*,  
140 2008) was amplified and ligated between two 0.5-kb-long genomic fragments surrounding the  
141 *hliB* gene. The plasmid was amplified in *E. coli* and transformed to *Synechocystis* via natural  
142 transformation. The mutant formed by double crossover was grown on selective BG-11 plates  
143 containing 50 µg mL<sup>-1</sup> spectinomycin.

144

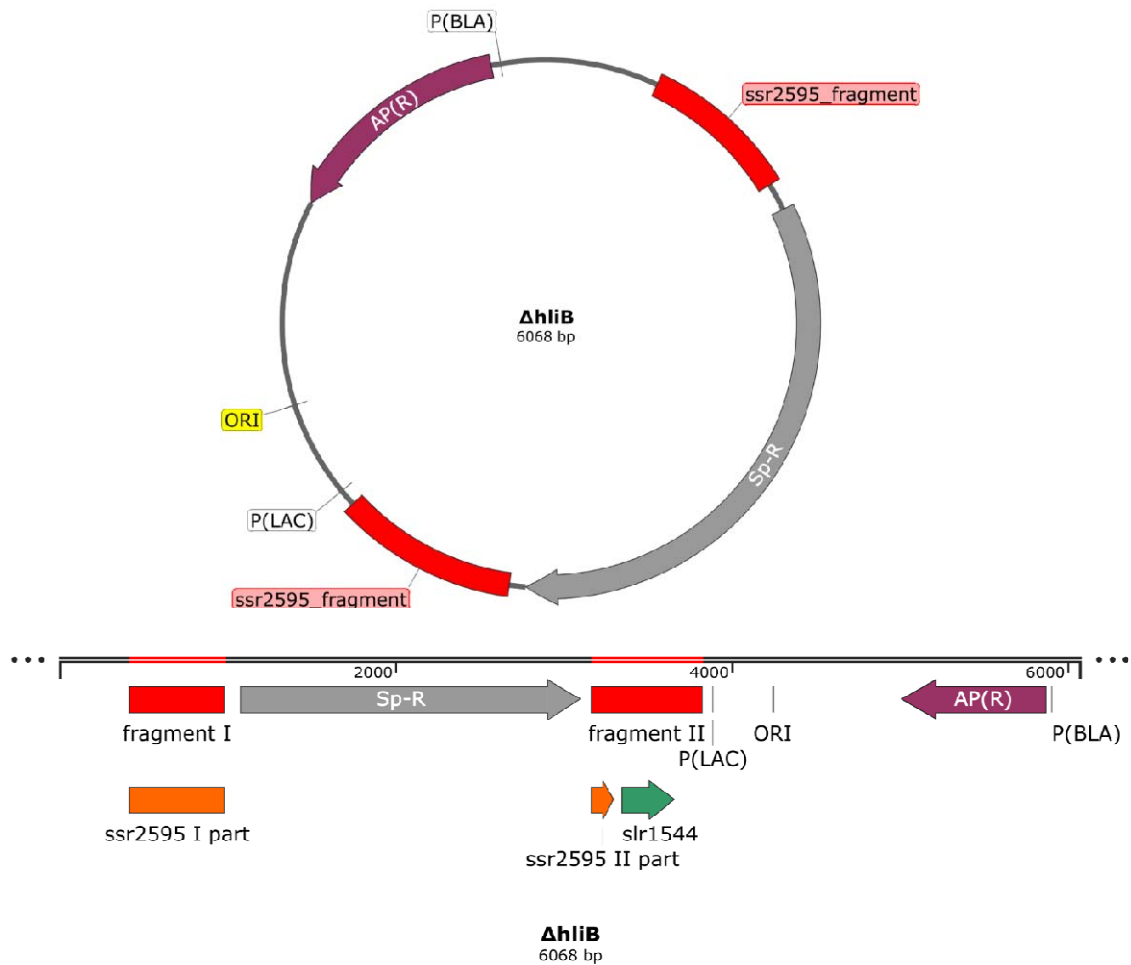

145 .

146

147 **Figure 1. Schematic representation of the mutagenic plasmid used for construction of**  
148 **the  $\Delta hliB$  strain.** The figure shows the plasmid map of the pUC19 vector with the ssr2595-  
149 Spe<sup>R</sup>-ssr2595 fragment.

150

### 151 *Construction of the hliBLux bioreporter strain*

152 We used the pILA promoter probe vector (Kunert *et al.*, 2000) utilizing the *LuxAB*  
153 luminescence reporter system. The insert of the *hliB* (*ssr2595*) promoter region was amplified  
154 by PCR using chromosomal DNA of WT *Synechocystis* as a template and the appropriate  
155 primer pair with restriction sites (Table 1).

156

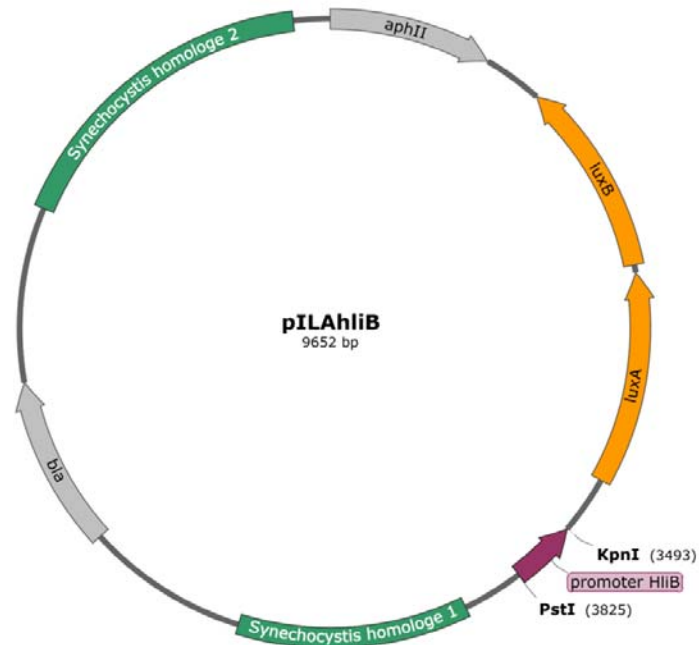

157 **Figure 2. Schematic figure of the pILA promoter probe vector with the insert of**  
 158 ***hliB* promoter.** We used the appropriate primers (Table 1) for the amplification of fragments  
 159 from the WT *Synechocystis* genome and applied KpnI-PstI digestion. *luxA* and *luxB* genes  
 160 code for the luciferase reporter proteins, which are required for the emission of detectable  
 161 bioluminescence. *aphII* and *bla* refer to genes conferring resistance to ampicillin and  
 162 kanamycin, respectively.

163 The promoter fragments were inserted into the unique PstI-KpnI site of pILA. *E. coli*  
 164 transformants were grown on kanamycin selective LB plates. The pILAhliB plasmids were  
 165 amplified and isolated from *E. coli*. The wild-type *Synechocystis* strain was transformed and  
 166 the clones were selected with kanamycin selection as described above.

167

168

169 **Table 1. Oligonucleotides used in this work.**

| Gene symbol      | oligonucleotide sequence                                  |
|------------------|-----------------------------------------------------------|
| 2595Sp-R_Fwd     | 5' cctaggcaagCAATTCGTCACCAACAAAAAGCTCCATTGCAGGAACAAAAACAG |
| 2595Sp-R_Rev     | 5' cggcgtattCAGTCCAACCGGCTTGAACACTGCTGGCAAAAGCCAATGAGTGTA |
| Δ2595_confirm_F  | 5' TCACAACCCCTTCTCATCC                                    |
| Δ2595_confirm_R  | 5' CTAAACCGTCAATTTCCC                                     |
| rrm16Sa.fas-914F | 5' CAACGCGAAGAACCTTACCAA                                  |



|                    |                           |
|--------------------|---------------------------|
| rrn16Sa.fas-1048R  | 5' CTGCGGAAACGTGGGAGTGCCT |
| hliBssr2595_qPCR_F | 5' GTCTCAACAACCTCGCCA     |
| hliBssr2595_qPCR_R | 5' CAAGAGAGAAACAAAGCCAA   |
| slr1544 Fw         | 5'ACGCCGACACTGATA         |
| slr1544 Rev        | 5'TTGCCCAGTTGCTTATC       |
| hliA ssl2542 Fw    | 5'AATAAGGAGGGAGGCAAAAAC   |
| hliA ssl2542 Rev   | 5'ACAACCGTCTCAACAACCT     |
| hliC ssl1633 Fw    | 5'GATCAGGGCAGAGGAAAA      |
| hliC ssl1633 Rev   | 5'ACATAGACAACCCTCCCA      |
| hliD ssr1789 Fw    | 5'ACTACAACCGAACCAAAAC     |
| hliD ssr1789 Rev   | 5'ACCAGGATGAGGAGAAAAT     |
| sll0846Fw          | 5'TTCCCTCGAGTCTCTCT       |
| sll0846Rev         | 5'TTCCTGCTTGTTGTCTT       |
| sll1483Fw          | 5'AACCACCGAAAAATCTGC      |
| sll1483Rev         | 5'CTTCACCGGATTGAACCT      |
| ssr6062Fw          | 5'GTGGCCTACCCATAAAACAA    |
| ssr6062Rev         | 5'GTAAAAATCCAGCGGCAA      |
| Thrc1Fw            | 5'GCCGCGTTTGAAATTGTT      |
| Thrc1Rev           | 5'ATTCCCCATTACTTTCCCT     |
| coaT_Fw            | 5'CAAAATCCATCAACCCCC      |
| coaT_Rev           | 5'AAGCCACCACGAGAAAAA      |
| hspAFw             | 5'AAGAAGTTTTTTGTCCCTACG   |
| hspARev            | 5'CTTCTGTGTTTTGGATTGCT    |
| SigDFw             | 5'ACCTACTTGACCTCATCC      |
| SigDRev            | 5'TCCAAATATCCCGCACT       |

170

### 171 ***Bioluminescence assay***

172  $^1\text{O}_2$  treatments were carried out in 10 mL batches of *hliBLux Synechocystis* culture in  
173 BG-11 medium at 30°C under LL and HL conditions. For the generation of exogenous  $^1\text{O}_2$  we  
174 used either MB or RB photosensitizer dyes in 0.5  $\mu\text{M}$  concentration. When indicated, 5 mM  
175 histidine (His) was used as  $^1\text{O}_2$  scavenger (Rehman *et al.*, 2013). Aliquots were withdrawn in  
176 every 15 minutes for luminescence measurements performed using the previously described  
177 protocol (Patiy *et al.*, 2021).

178

### 179 ***Data analysis and representation***

180 The results were evaluated using the Microsoft Office Excel 2016 program and the  
181 OriginPro 2021b data analysis program. The *in silico* design of the molecular biology work  
182 and the analysis of our whole transcriptome data were performed using the CLC Genomics  
183 Workbench 20.0 (QIAGEN). Figures 4A and 5A were created using the UpSet online  
184 intersecting sets visualization program (Lex *et al.*, 2014).

## 185 **Results**

### 186 *Global transcript analysis of gene expression changes induced by <sup>1</sup>O<sub>2</sub>*

187 To identify genes, whose expression is affected by <sup>1</sup>O<sub>2</sub>, we exposed *Synechocystis* cells  
188 to <sup>1</sup>O<sub>2</sub> generated either by HL illumination in the absence of any addition (endogenous <sup>1</sup>O<sub>2</sub>),  
189 or by illumination in the presence of MB or RB (exogenous <sup>1</sup>O<sub>2</sub>). This illumination protocol  
190 allowed us to monitor changes in the expression of genes that are sensitive to <sup>1</sup>O<sub>2</sub> generated  
191 via pigment molecules of the photosynthetic apparatus, as well as by the added  
192 photosensitizers. The application of His as a <sup>1</sup>O<sub>2</sub> scavenger allowed the confirmation of the  
193 <sup>1</sup>O<sub>2</sub> specificity of the genes.

194 In the first step of transcript analysis we compared the transcript abundance of samples  
195 kept in low light with that of samples exposed to high light (LL vs HL). A strong effect of HL  
196 treatment on gene expression was visible for about 500 genes showing changes in expression  
197 in the form of either induction ( $\log_2FC > 0.9$ ) or repression ( $\log_2FC < -0.9$ ) (Fig. 3A).

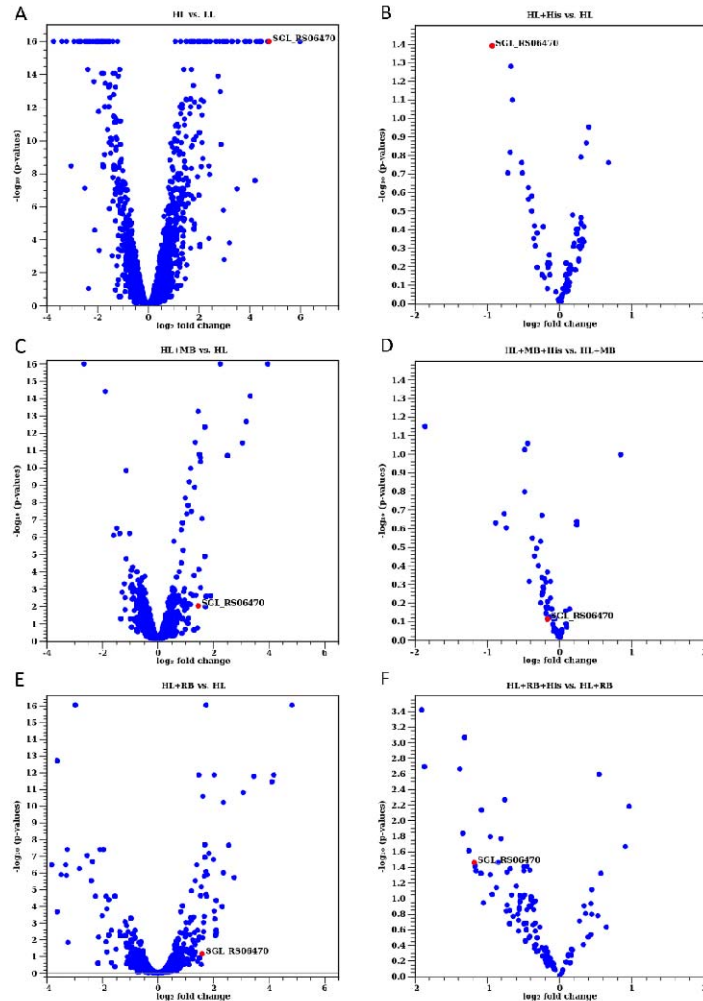

198 **Figure 3. Volcano plots of the global transcript analysis of wild-type *Synechocystis***  
199 **cells.** The cyanobacterial cells were exposed to low (LL: 30  $\mu\text{mol photon m}^{-2} \text{s}^{-1}$ ) or high  
200 (HL: 200  $\mu\text{mol photon m}^{-2} \text{s}^{-1}$ ) light intensity in the absence or presence of  $^1\text{O}_2$   
201 photosensitizer dyes (MB and RB) and the  $^1\text{O}_2$  scavenger His. (A) The effect of HL alone  
202 (HL vs. LL), (B) The effect of 5 mM His on HL-induced gene expression, i.e. His +HL vs.  
203 HL, abbreviated as (HL+His vs HL). (C) Gene induction by 0.5  $\mu\text{M}$  MB in the presence of  
204 HL, i.e. MB+HL vs. HL, abbreviated as (MB vs HL), and (D) the effect of 5 mM His on MB-  
205 induced gene expression, i.e. HL+MB+His vs. HL+MB. (E) Gene induction by 0.5  $\mu\text{M}$  RB in  
206 the presence of HL, i.e. HL+RB vs. HL, and (F) the effect of 5 mM His on RB-induced gene  
207 expression, i.e. HL+RB+His vs. HL+ RB. The statistical significance (-log<sub>10</sub> p- values) is  
208 shown on the Y axis versus the magnitude of change (log<sub>2</sub>fold change) on the X axis. The  
209 data points represent the mean value of 3 biological replicates. The expression results of the  
210 *hliB* (SGL\_RS06470) gene are highlighted in red.

211 Since HL can induce gene expression via different mechanisms, the  $^1\text{O}_2$ -specific genes  
212 were identified by the addition of 5 mM His which was present during the light treatment. His  
213 largely eliminates  $^1\text{O}_2$ , via chemical scavenging, before it could interact with other molecules.  
214 Therefore, the subset of HL-induced genes whose expression is decreased or increased in the  
215 presence of His, as compared to the absence of His, represents genes whose expression is  
216 specifically enhanced or suppressed by  $^1\text{O}_2$ , respectively (Fig. 3B, D, F).

217 Considering that the generation of  $^1\text{O}_2$  by photosensitizer dyes requires high light  
218 illumination, we used the expression results of the HL treatment as a control for evaluating  
219 the gene expression changes induced by using MB or RB to generate exogenous  $^1\text{O}_2$  in the  
220 cells. In this way the background effect of HL on gene expression could be eliminated. For  
221 verification purposes the treatments were carried out both with RB and with MB (separately).  
222 In order to avoid unreliable results of the relative expression calculations, genes with  
223 negligible read numbers (max group mean < 10) in the respective control samples were  
224 disregarded.

225 Fig. 3C shows those genes whose expression changed in the presence of MB relative to  
226 the HL control, whereas Fig. 3D depicts the effect of His addition on the MB-induced effect.  
227 Fig. 3E shows those genes whose expression changed in the presence of RB relative to the HL  
228 control, whereas Fig. 3F depicts the effect of His addition on the RB-induced effect. As  
229 described above for the His+HL vs. HL treatment, the genes in Fig. 3D (His+MB+HL vs.  
230 MB+HL) and 3F (His+RB+HL vs. RB+HL) represent the subset of genes whose expression  
231 was specifically affected by externally generated  $^1\text{O}_2$  induced by the MB and RB  
232 photosensitizer dyes, respectively.

233

### 234 ***Identification of genes with $^1\text{O}_2$ -specific transcript level changes***

235 In order to identify genes whose expression is modified specifically by  $^1\text{O}_2$  we created  
236 plots by which the affected genes can be organized into specific groups according to their  
237 treatment-specific responses (Fig. 4). The set size in Fig. 4A represents the number of genes,  
238 which were affected by the indicated treatment either alone or in combination with other  
239 treatments (e.g. 80 genes were affected by RB in one way or the other). The intersection size  
240 shows the number of genes, which were affected by a particular treatment or by the  
241 combination of two or more treatments (e.g. 30 genes were induced by RB alone and

242 additional 25 genes by both RB and MB, etc.). Fig. 4B shows the names of genes, which  
243 belong to the most important  $^1\text{O}_2$ -responsive groups. The 25 genes which were induced by  
244 both MB and RB include a transcriptional regulator, ABC transporters, iron homeostasis-  
245 related genes, as well genes with unknown function. Genes which were induced by both HL  
246 and RB include *psbA2*, providing the bulk of *psbA* transcript for the synthesis of the D1  
247 subunit of the PSII reaction center. The *slr0228* gene, which encodes one member of the FtsH  
248 protease family and plays an important role in the degradation of photodamaged D1 protein  
249 molecules (Silva *et al.*, 2003) was also induced by both HL and RB. The addition of His  
250 reversed the HL- and/or MB-, RB -induced upregulation of several genes, which include  
251 response regulators, the *isiA* Chl binding protein, and the *sigD* transcription factor (Fig. 4B).  
252 Three genes belong to the group whose members can be equally induced by HL, MB, and RB  
253 and at the same time the induction by RB can be reversed by His, providing strong support for  
254  $^1\text{O}_2$  specificity. We could identify only one gene (*ssr2595*) encoding for the high light  
255 inducible *hliB/scpD* protein whose transcription was enhanced by HL, MB or RB and at the  
256 same time was reversible by His, clearly demonstrating its specificity for  $^1\text{O}_2$ .

257 As shown above in Fig. 3,  $^1\text{O}_2$  can not only enhance, but also suppress the transcript  
258 abundance of several genes. The details of this effect are summarized in Fig. 5. Three genes  
259 were suppressed by both RB and HL and three additional genes by both RB and MB. These  
260 include the *coaT* and *cadA* P-type ATP-ases, transfer RNAs for different amino acids, a  
261 phycobilisome core-rod linker peptide and hypothetical proteins.

262

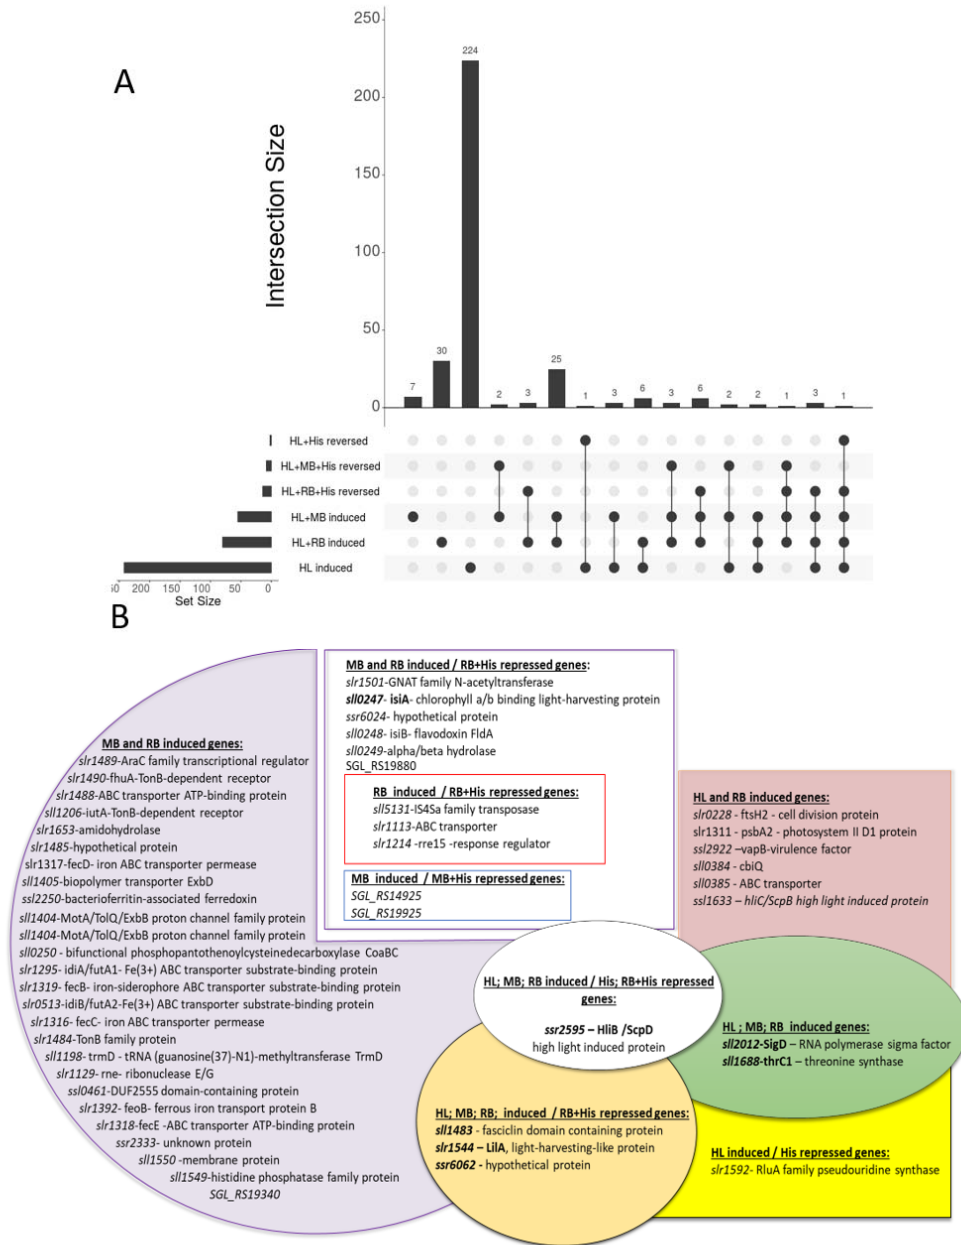

263  
 264 **Figure 4.** Diagrams of the  $^1\text{O}_2$ -induced gene sets **A**, Representation of the sizes of  $^1\text{O}_2$ -  
 265 induced gene sets, indicating the connection of individual sets and the number of genes  
 266 belonging to them. Horizontally, the Set Size bars indicate the total number of genes  
 267 induced/repressed during the given treatment. Vertically, the Intersection Size bars represent  
 268 the number of genes which belong to the intersections of the various treatments (marked with  
 269 full dots connected by a line) and the number of genes remaining in the set without  
 270 intersection by other treatments (indicated by one full dot). **B**, Groups of the induced genes

271 belonging to the most important categories of treatments used for  $^1\text{O}_2$  generation. The genes  
 272 studied in detail are highlighted in bold.

273

274  $^1\text{O}_2$  specificity could be demonstrated by His-induced reversal of the transcript  
 275 suppression effect in case of several genes, which encode transfer RNAs, the *HspA* heat-  
 276 shock protein, and a DUF1232 domain protein.

277

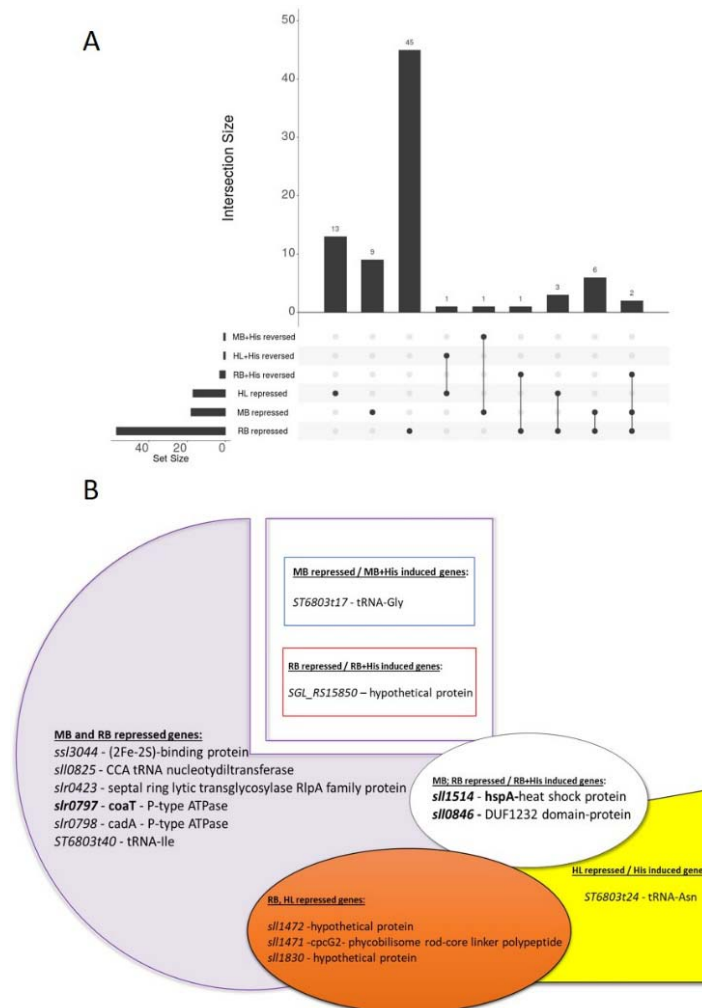

278 **Figure 5.** Diagrams of the  $^1\text{O}_2$ -repressed gene sets **A**, Representation of the sizes of  $^1\text{O}_2$ -  
 279 repressed gene sets, indicating the connection of individual sets and the number of genes  
 280 belonging to them. Horizontally, the Set Size bars indicate the total number of genes whose  
 281 transcript level changed above the threshold level during the given treatment. Vertically, the  
 282 Intersection Size bar represents the number of genes which belong to the intersections of the  
 283 various treatments (marked with full dots connected by a line) and the number of genes  
 284 remaining in the set without intersection by other treatments (indicated by one full dot). **B**,



285 Groups of the repressed genes belonging to the most important categories of treatments used  
286 for  $^1\text{O}_2$  generation. The genes studied in detail are highlighted in bold.

287

288

### 289 ***qPCR confirmation of $^1\text{O}_2$ -induced gene expression changes***

290 From the large set of  $^1\text{O}_2$ -inducible and repressible genes 13 were selected for  
291 confirmation by qPCR analysis: the high-light-inducible gene family (*hliA*, *hliB*, *hliC* and  
292 *hliD*), *slr1544* (*lilA*, a light-harvesting-like protein which forms a transcription unit with  
293 *hliB*), *sll1483* (a protein with unknown function containing a periplasmic fasciclin domain),  
294 *ssr6062* (hypothetical protein), *sll1688* (*thrC1*, a threonine synthase), *sigD* (an RNA  
295 polymerase sigma factor), *isiA* (iron- and photooxidative stress-responsive Chl binding  
296 protein), *hspA* (a small heat shock protein), *sll0846* (encoding a hypothetical DUF domain  
297 containing protein), *coaT* (*slr0797* encoding a presumably  $\text{Co}^{2+}$  exporting P-type ATPase).

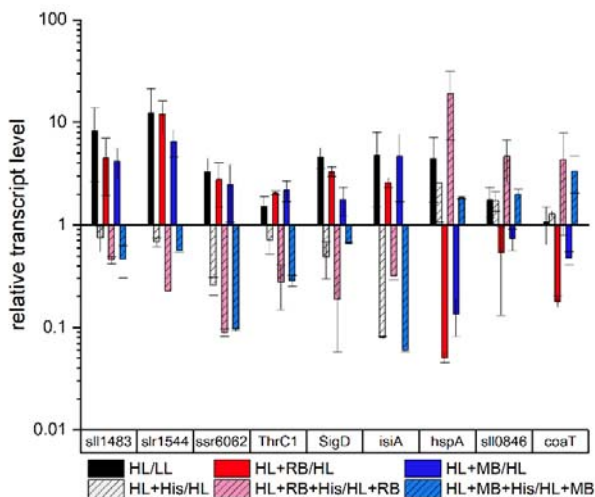

298

299 **Figure 6.** Gene expression of genes selected for detailed investigation by qPCR. Mean+SE,  
300 n=3).

301 The qPCR analysis confirmed the  $^1\text{O}_2$ -related gene expression changes, which were  
302 obtained from the global transcript analysis for *slr1544*, *sll1483*, *ssr6062*, *ThrC1*, *sigD*, *coaT*,  
303 and *isiA*, and showed a partial agreement in the case of *hspA* and *sll0846*. The function and  
304 possible relation of these genes to  $^1\text{O}_2$  will be discussed in the Discussion section.



305 <sup>1</sup>O<sub>2</sub> response of the *hli* gene family

306

307 The most promising gene for <sup>1</sup>O<sub>2</sub>-specific induction was *hliB* marked as *SGL\_RS06470*  
308 (old tag: *ssr2595*), which was induced not only by HL, as a result of <sup>1</sup>O<sub>2</sub> production from  
309 endogenous photosensitizers (most likely Chls from the photosynthetic apparatus), but also by  
310 illumination in the presence of exogenous photosensitizers RB and MB in a His-reversible  
311 way (Fig. 3, 4B, and 7). In addition, *hliB* was one of the genes which showed the strongest  
312 increase in expression (log<sub>2</sub>FC = 4.7) upon HL exposure (Fig. 3A). The dependence of *hliB*  
313 expression on high light and oxidative stress has already been described (He *et al.*, 2001;  
314 Akulinkina *et al.*, 2015; Cheregi & Funk, 2015; Konert *et al.*, 2022), but the involvement of  
315 <sup>1</sup>O<sub>2</sub> in the regulation of *hliB* expression has not been known.

316 Since *hliB* belongs to the *hli* gene family, all of whose members are induced by high  
317 light (Bhaya *et al.*, 2002; Cheregi & Funk, 2015; Konert *et al.*, 2022), we aimed to verify  
318 whether or not the other *hli* genes (*hliA*, *hliC* and *hliD*) also respond to <sup>1</sup>O<sub>2</sub>. To this end, we  
319 verified the transcript level changes of the four *hli* genes using qPCR. The data show that the  
320 other three members of the *hli* gene family respond similarly to HL, RB, MB as *hliB*,  
321 although the extent of their response is smaller than that of *hliB*, especially in case of *hliD*

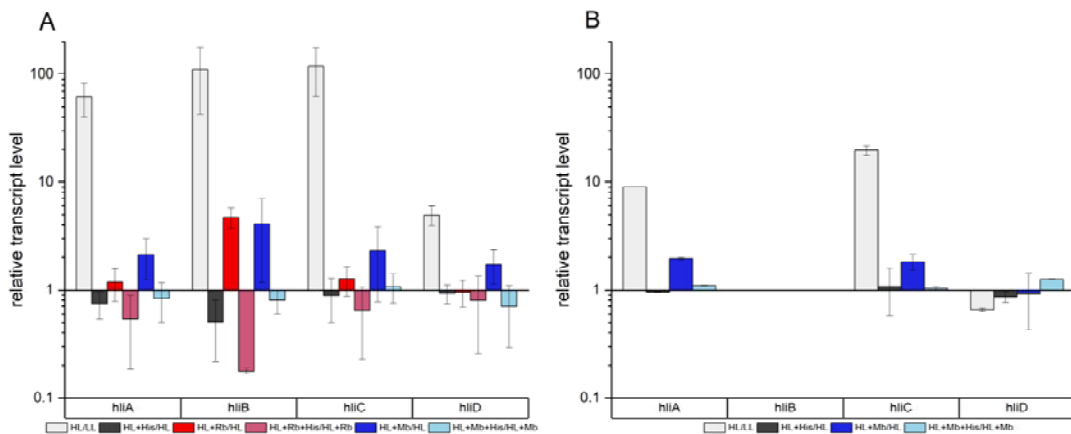

322 (Fig. 7A). Since the induction of the transcript levels is largely prevented by His, one can

323 **Figure 7.** Expression changes of *hli* genes in WT (A) or  $\Delta hliB$  (B) *Synechocystis* cells  
324 exposed to LL and HL illumination with 0.5  $\mu$ M MB and its application with 5 mM His  
325 (Mean+SE, n=3).

326 conclude that  $^1\text{O}_2$  is involved in the regulation of the expression of all *hli* genes, although the  
327 strongest response is shown by *hliB*. As was shown in Fig. 6 above, *lilA* (*slr1544*), which  
328 forms a common transcription unit with *hliB* also shows a strong upregulation by HL, RB,  
329 and MB in a His-reversible way, therefore it is also identified as a  $^1\text{O}_2$ -responsive gene.

330 In order to clarify if the *hliB* gene or its HliB protein product might be involved in the  
331 regulation of the other members of the *hli* gene family, we created a  $\Delta hliB$  mutant via  
332 replacing this gene by a *Spectinomycin* resistance cassette (Fig. 1). In this deletion mutant the  
333  $^1\text{O}_2$ -induced expression of the *hliA* and *hliC* genes was practically the same as in the WT.  
334 Interestingly, however, *hliD* was not expressed in the deletion mutant under HL or MB  
335 exposure (Fig. 7B). These data show that *hliB* deficiency has no influence on the transcript  
336 levels of *hliA* and *hliC*, but has a direct or indirect influence on the expression of *hliD*.

337

### 338 ***The protective role of HliB against $^1\text{O}_2$ -mediated photodamage***

339 The  $^1\text{O}_2$ -specific enhancement of *hliB* gene expression raises the possibility that the  
340 HliB protein has a well-defined role in protection against  $^1\text{O}_2$ -induced damage. In order to  
341 clarify this hypothesis, the WT and  $\Delta hliB$  mutant strains were grown under HL illumination in  
342 the absence and presence of the  $^1\text{O}_2$  sensitizers MB or RB. Both dyes resulted in a significant  
343 growth inhibition in the WT strain, which was more pronounced in the presence of MB than  
344 RB, demonstrating the overall damaging effect of exogenous  $^1\text{O}_2$  on cell growth. Deletion of  
345 the *hliB* gene enhanced the growth retardation not only in the presence of both dyes, but also  
346 under HL without addition (Fig. 8). This phenotype of the  $\Delta hliB$  mutant supports the  
347 assumption that HliB plays an important role in the defense against  $^1\text{O}_2$  in *Synechocystis*.  
348 These data are in basic agreement with earlier results showing HL-induced growth retardation  
349 of a *Synechocystis* mutant lacking all the four *hli* genes (He *et al.*, 2001; Havaux *et al.*, 2003).  
350 However, our data also demonstrate that the deletion of *hliB* alone is sufficient for growth  
351 retardation, and show that  $^1\text{O}_2$  plays an important role in HL-induced growth retardation in  
352 the absence of HliB.

353

354

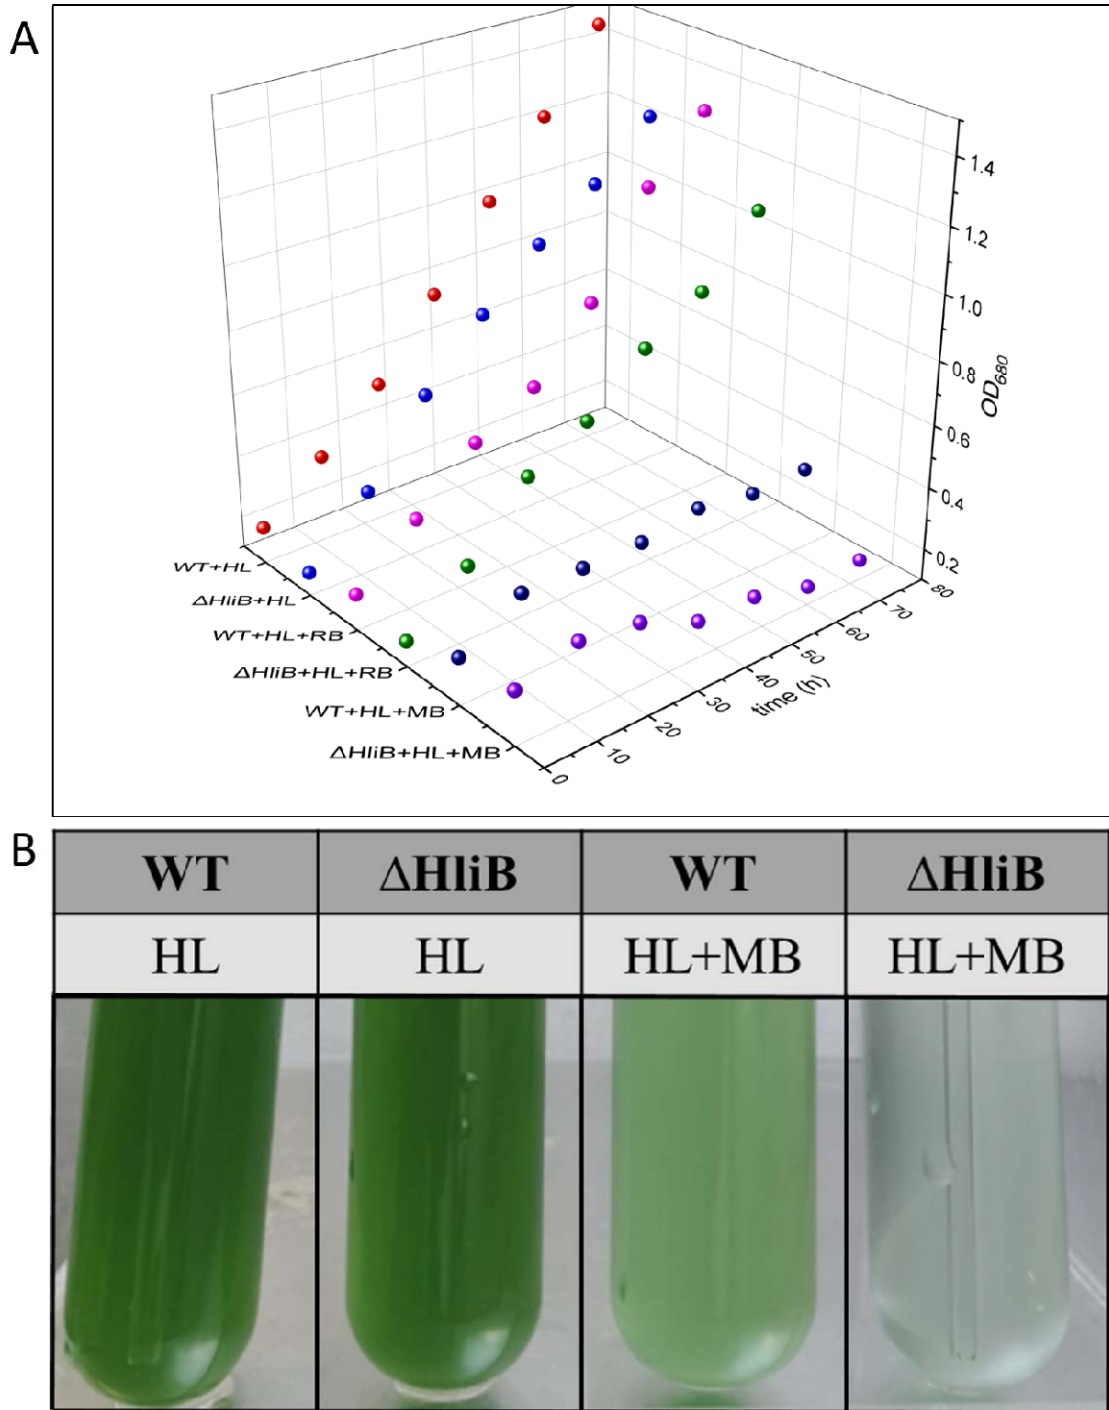

355

356 **Figure 8. A:** The growth curves of the WT and  $\Delta hliB$  *Synechocystis* cells in different  $^1O_2$   
357 treatments. **B:** The photo of visible growth inhibition of  $\Delta hliB$  and WT *Synechocystis* cells  
358 under HL illumination in the continuous presence of MB (0.5  $\mu$ M).

359

### 360 ***The hliBLux <sup>1</sup>O<sub>2</sub> bioreporter strain***

361 An important reason for carrying out the global transcriptome survey was to find  
362 promoters that respond specifically to <sup>1</sup>O<sub>2</sub>, allowing the construction of whole cell  
363 bioreporters, similarly to our previous studies (Peca *et al.*, 2007, 2017; Patyi *et al.*, 2021).  
364 Such a strain would facilitate continuous monitoring of <sup>1</sup>O<sub>2</sub> production, a technique that was  
365 so far not available for cyanobacteria. The results described above show that the *hliB* gene is  
366 specifically induced by <sup>1</sup>O<sub>2</sub>. In order to utilize its <sup>1</sup>O<sub>2</sub>-dependent expression we constructed a  
367 *Synechocystis* strain by fusing the *hliB* promoter with the bacterial luciferase reporter system,  
368 and designated it as *hliBLux*. To test its utility for <sup>1</sup>O<sub>2</sub> sensing in cellular environment we  
369 performed <sup>1</sup>O<sub>2</sub> treatments using the same approach as for the gene expression studies, but  
370 instead of transcript levels the bioluminescence intensity was detected (Fig. 9).

371 When *hliBLux* cells were exposed to LL, only a moderate luminescence response was  
372 observed (Fig. 9A). However, the luminescence response was enhanced by HL ca. 7-fold  
373 relative to the LL conditions (Fig. 9B). Importantly, the luminescence induction was largely  
374 retarded in the presence of His showing that it was caused by endogenously produced <sup>1</sup>O<sub>2</sub>  
375 (Fig. 9B). The luminescence intensity was further increased when HL exposure was  
376 performed in the presence of MB or RB, and His addition retarded both effects (Fig. 9B).  
377 These data provide evidence that the luminescence response indeed reflects <sup>1</sup>O<sub>2</sub> production  
378 and also that the *hliBLux* strain can be used to detect <sup>1</sup>O<sub>2</sub> inside the *Synechocystis* cells when  
379 produced from either endogenous or exogenous sources.

380 Even though MB and RB were applied at the same (0.5 μM) concentration, MB  
381 produced higher luminescence response of the *hliBLux* biosensor than RB (Fig. 9) in  
382 agreement with the higher level *hliB* upregulation by MB (Figs. 3C, 3E). On the other hand,  
383 RB induced a higher number of genes than MB (Figs. 3C, 3E and 4A) both in the group  
384 where His was able to reverse the induction effect and in the groups where the His effect was  
385 not obvious. This might be related to the different accessibility of the interior of *Synechocystis*  
386 cells for the two dyes and/or to the accessibility for His of the cell compartments that MB or  
387 RB could reach and where they could produce <sup>1</sup>O<sub>2</sub>.

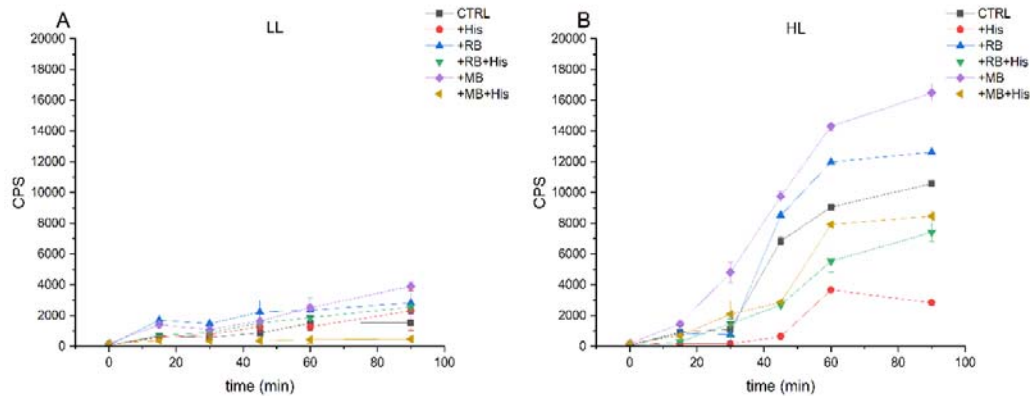

388

389

390 **Figure 9. The bioluminescent response of the *hliBlux* strain to MB and RB.** Cells were  
391 incubated in BG-11 medium exposed to LL (A) or HL (B) conditions and supplemented with  
392 different photosensitizers with or without 5 mM His before bioluminescence was measured.  
393 Each point represents the mean of three parallels.

394

395

## 396 Discussion

397 In the present work we performed a complete transcript analysis in the cyanobacterium  
398 *Synechocystis* 6803 under conditions where  $^1\text{O}_2$  was generated either from endogenous (HL-  
399 excited natural pigments) or exogenous (HL-excited MB or RB photosensitizers) sources. Our  
400 transcript profile analysis revealed a large set of  $^1\text{O}_2$ -responsive genes, which demonstrates  
401 that cyanobacteria are able to respond to  $^1\text{O}_2$  exposure by specific changes in gene expression,  
402 similarly to all other photosynthetic organisms.

403

### 404 *Overlap of $^1\text{O}_2$ - and HL-dependent regulation of gene induction in *Synechocystis**

405 In photosynthetic organisms  $^1\text{O}_2$  is produced mostly via the Type-II photodynamic  
406 effect of pigments which participate in harvesting light energy. In addition,  $^1\text{O}_2$  production via  
407 the photodynamic effect is practically linearly proportional with light intensity (Rehman et al.,

408 2013). Therefore, one would expect to find  $^1\text{O}_2$ -induced upregulation of genes mostly among  
409 the high-light-inducible genes of *Synechocystis*. Previous studies have identified a large set of  
410 genes with light-dependent expression profile in *Synechocystis* (He *et al.*, 2001; Hihara *et al.*,  
411 2001; Bhaya *et al.*, 2002; Hsiao *et al.*, 2004; Ogawa *et al.*, 2018). However, the possible  
412 involvement of  $^1\text{O}_2$  in this effect has not been studied previously. Our analysis has indicated  
413 the presence of 82 HL-responsive genes whose expression change is prevented by the  $^1\text{O}_2$   
414 scavenger His (Fig. 3B) and therefore can be assigned to  $^1\text{O}_2$ .

415 Intracellular  $^1\text{O}_2$  production by photosensitizer dyes such as RB or MB also induced  
416 several genes in a His-reversible way, which showed a partial overlap with the HL-inducible  
417  $^1\text{O}_2$ -dependent genes (Figs. 3D, 3F, 4). From these data we can safely conclude that HL-  
418 induced regulation of a sizeable subset of *Synechocystis* genes is mediated, at least partly, by  
419  $^1\text{O}_2$ -dependent signaling pathways.

420

#### 421 ***$^1\text{O}_2$ -mediated regulation of the hli gene family***

422 The *hli* family is of a special importance among the  $^1\text{O}_2$ -responsive genes. It consists  
423 of 4 members (A-D) which encode small chlorophyll-binding proteins, also called SCPs, or  
424 HLIPs. There is a 5<sup>th</sup> gene (*slr1544* or *lilA*) which is structurally similar to the SCPs and  
425 forms a transcription unit with *hliB* (Kufryk *et al.*, 2008). Both the SCP and LilA proteins  
426 contain a long hydrophilic N-terminal region and a transmembrane C-terminal region, with  
427 two residual conserved regions of Chl-binding domains. It has also been shown that LilA can  
428 bind to PSII under stress (Kufryk *et al.*, 2008) similarly to HilB and HliC (Komenda &  
429 Sobotka, 2016). Our data demonstrate that  $^1\text{O}_2$  is involved in the HL-induced upregulation of  
430 the *hli* and *lilA* genes (Figs. 6 and 7). It is interesting to note that while the *hli* genes are  
431 expressed only under HL exposure (and some other stress conditions such as low temperature,  
432 N- and S-limitation (He *et al.*, 2001)) in WT *Synechocystis* cells, they are constitutively  
433 present in the PSI-less mutant (Funk & Vermaas, 1999). This observation can be explained by  
434 the increased rate of  $^1\text{O}_2$  formation in the PSI-less mutant (Kodru *et al.*, 2020), which induces  
435 a high level of *hli* transcripts.

436  $^1\text{O}_2$  production and the related photodamage is enhanced in the *Synechocystis* mutants  
437 lacking the *hli* and *lilA* genes demonstrating the important protective role against  $^1\text{O}_2$ -  
438 mediated photodamage of their protein products (He *et al.*, 2001; Sinha *et al.*, 2012). Our data

439 show that the lack of the most strongly  $^1\text{O}_2$ -responsive *hli* gene, *hliB*, in itself is sufficient to  
440 induce significant retardation of cell growth under conditions of  $^1\text{O}_2$  production (Fig. 8). In  
441 agreement with previous suggestions (Sinha *et al.*, 2012) the protective role of the Hli  
442 proteins can be exerted by binding Chl molecules, which are released during photodamage  
443 and/or repair of the PSII complex and represent a dangerous source of  $^1\text{O}_2$  production in their  
444 free form, in a protein environment which is similar to that of the light-harvesting complexes  
445 and includes protective carotenoids (Konert *et al.*, 2022) that decrease  $^1\text{O}_2$  formation. It is of  
446 note that the HliB protein was also found in association with PSII (Promnares *et al.*, 2006;  
447 Komenda & Sobotka, 2016).

448 Although all the four *hli* genes were induced by  $^1\text{O}_2$ , the extent of their upregulation  
449 was different, *hliB* (and the co-transcribed *lila*) and *hliD* being the most and the least induced  
450 ones, respectively. The reason for this difference is not fully clear, but most likely related to  
451 the promoter region of the genes which may have specific sites for sensing a transcription  
452 factor or some other component that is produced or modified by  $^1\text{O}_2$  (Page *et al.*, 2017).

453 Deletion of the *hliB* gene had only a minor effect on the  $^1\text{O}_2$  response of *hliA* and *hliC*,  
454 but largely eliminated the induction of *hliD* (Fig. 7B). These data show that the HliB protein  
455 does not participate in a signaling event that would influence the  $^1\text{O}_2$ -dependent expression of  
456 *hliA* and *hliC*; however, it has an indirect or direct effect on the expression of *hliD*.

457 We have utilized the strong,  $^1\text{O}_2$ -specific induction of *hliB* to create a  $^1\text{O}_2$  reporter  
458 construct that contains the  $^1\text{O}_2$ -inducible *hliB* promoter fused to bacterial luciferase. It  
459 responds to  $^1\text{O}_2$  when generated either by the endogenous pigments of the photosynthetic  
460 apparatus or by added photosensitizer dyes in a His-repressible manner (Fig. 9), and provides  
461 a useful tool for monitoring intracellular  $^1\text{O}_2$  conditions under various stress conditions.

462

### 463 ***Effect of $^1\text{O}_2$ on Photosystem II repair-related genes***

464 Repair of photodamaged PSII is a very important process that helps to maintain  
465 photosynthetic activity under elevated light conditions (Aro *et al.*, 1993). The main steps of  
466 PSII repair are proteolytic degradation of the damaged D1 subunits via involvement of the  
467 FtsH protease (Silva *et al.*, 2003), followed by *de novo* synthesis of new D1 copies which is  
468 regulated transcriptionally in cyanobacteria by producing *psbA* mRNA (Nixon *et al.*, 2010;  
469 Järvi *et al.*, 2015). In order to function optimally, the repair process should be closely



470 regulated not only by the already occurred damage, but also by the factors that induce the  
471 damage to PSII. Therefore, it is not surprising that  $^1\text{O}_2$ , which is an important damaging factor  
472 of PSII structure and function (Vass & Cser, 2009; Zavafer, 2021) induces upregulation of  
473 genes which are involved in PSII repair, such as *psbA2* (Fig. 4, Supplementary Table 1) that  
474 provides the largest contribution to the *psbA* transcript pool for synthesis of D1 (Mohamed *et*  
475 *al.*, 1993). Interestingly, both the *ftsH2* and *ftsH3* genes, which encode the FtsH2 and FtsH3  
476 subunits of the D1-degrading FtsH complex are upregulated by  $^1\text{O}_2$ . These data show that the  
477 well-known HL-induced upregulation of the *ftsH2* and *ftsH3* and *psbA2* genes (see e.g.  
478 Hernández-Prieto *et al.*, 2016) occurs partly via  $^1\text{O}_2$ , which helps to induce the PSII repair  
479 machinery on the side of both D1 degradation and de novo synthesis.

480 The  $^1\text{O}_2$ -induced boosting of PSII repair is particularly interesting, since a long-  
481 standing dogma states that  $^1\text{O}_2$  does not induce damage to PSII, therefore would not need to  
482 enhance its repair, and the only effect of  $^1\text{O}_2$  in PSII photoinhibition would be the inhibition  
483 of *de novo* D1 synthesis (Nishiyama *et al.*, 2004), which contradicts various observations  
484 (Rehman *et al.*, 2013; Fischer *et al.*, 2013; Bashir *et al.*, 2021) including our present findings.

485

#### 486 ***Overlap of $^1\text{O}_2$ with the salt-, hyperosmotic and cold stress response***

487 Salt-, hyperosmotic and cold stress are characteristic phenomena, which change the  
488 expression of a large set of genes (Kanesaki *et al.*, 2002; Liu *et al.*, 2013) and can enhance  
489 photodamage. Therefore, it is interesting to note that some of the  $^1\text{O}_2$ -responsive genes  
490 identified in our work are also induced by salt and/or hyperosmotic or cold-stress conditions.  
491 The most important genes, which are upregulated by  $^1\text{O}_2$  as well as by salt- and/or  
492 hyperosmotic stress are *hliA*, *hliB*, *lilA*, *isiA*, *ssr2016*, *slll483* (fasciclin), and *slll515*  
493 (DUF4278) based on the comparison of our data and earlier published results (Kanesaki *et al.*,  
494 2002). Some other genes (e.g. *hliA*, *hliB*, *hliC*, *psbA2*, and tRNAs for several amino acids) are  
495 shared between the  $^1\text{O}_2$ - and cold-induced transcript changes based on the comparison of our  
496 data with earlier published results (Liu *et al.*, 2013).

497 These observations point to the possibility that  $^1\text{O}_2$  may participate in the regulation of  
498 the expression of the above genes not only under HL, but also under other stress conditions  
499 (salt, hyperosmotic, cold), or that these genes can be regulated independently by several  
500 mechanisms. Clarification of this interesting point will require further studies.



501

## 502 ***Overlap of $^1\text{O}_2$ with iron homeostasis***

503 In *Synechocystis* and some other cyanobacteria, iron starvation leads to the synthesis of  
504 the IsiA protein which protects the photosystems against oxidative stress. *isiA* encodes a Chl-  
505 containing light harvesting complex and has been shown to be upregulated not only by iron  
506 starvation but also by high light under iron replete conditions (Havaux *et al.*, 2005). We have  
507 observed His-reversible induction of *isiA* by HL and RB or MB (Fig. 6), which points to the  
508 involvement of  $^1\text{O}_2$  in the HL-induced response of *isiA*.

509 One of the suggested functions of *isiA* is to provide temporary binding environment for  
510 Chls which are released from light harvesting complexes under Fe-limiting conditions  
511 (Riethman *et al.*, 1988; Chen *et al.*, 2018). Our observation of  $^1\text{O}_2$ -induced upregulation of  
512 *isiA* confirms this idea, since free Chls are very efficient  $^1\text{O}_2$  sensitizers whose presence  
513 should be avoided. Therefore, IsiA could exert photoprotection via the same mechanism as  
514 the HLIP (SCP) proteins, i.e. by providing a temporary sequestration for Chls in the vicinity  
515 of protective carotenoids. It has also been suggested that IsiA forms a large photoprotective  
516 complex together with HliA and some other proteins, as well as carotenoids (zeaxanthin and  
517 myxoxanthophyll) (Daddy *et al.*, 2015).

518 Oxidative stress in general has been implicated in the induction of *isiA* since it was  
519 induced in *Synechocystis* under iron replete conditions not only by high light, but also by salt  
520 stress, methylviologen and  $\text{H}_2\text{O}_2$  (see (Michel & Pistorius, 2004) and (Havaux *et al.*, 2005)  
521 and references therein). Our data show that one of the specific oxidative signals that induce  
522 *isiA* expression is  $^1\text{O}_2$ , but this does not exclude the involvement of other oxidative  
523 components which may act independently of, or indirectly via,  $^1\text{O}_2$ . Besides *isiA* the iron-  
524 deficiency-induced *idiA* gene was also induced by RB treatment, which is in agreement with  
525 the earlier suggested role of IdiA in protection against photooxidative damage (Glaeser *et al.*,  
526 2011).

527

## 528 ***$^1\text{O}_2$ induced suppression of *Synechocystis* genes***

529 A potentially interesting finding of our work was the identification of genes, which  
530 were suppressed by  $^1\text{O}_2$ . This aspect of  $^1\text{O}_2$ -induced gene responses had been realized earlier

531 in *Arabidopsis*, where  $^1\text{O}_2$  induced the suppression of genes involved in the synthesis of  
532 photosynthetic pigments (Page *et al.*, 2017), which was, however, not observed in our case. In  
533 *Synechocystis* the *sll1471*, *sll1472* and *sll1830* genes were suppressed by HL and RB in a  
534 partly His-reversible way, indicating the involvement of  $^1\text{O}_2$ . *sll1472* and *sll1830* encode  
535 unknown proteins; however, the gene product of *sll1471* is the so-called CpcG2, a linker  
536 protein for the Photosystem I phycobilisome antenna. CpcG2 has been shown to participate in  
537 the formation of the NDH-1L-CpcG2-PSI supercomplex that facilitates cyclic electron  
538 transport around PSI via NDH-1L in cyanobacteria (Gao *et al.*, 2016), whose absence leads to  
539 high light sensitivity. Since cyclic electron flow is a protective mechanism against HL-  
540 induced stress, which also protects against  $^1\text{O}_2$  formation, it would be physiologically  
541 counterintuitive to assume  $^1\text{O}_2$ -induced downregulation of CpcG2 leading to decreased cyclic  
542 electron flow as part of photoprotection. Therefore, it is more probable that the suppression of  
543 *sll1471* (CpcG2) expression is due to a damaging effect of  $^1\text{O}_2$ .

544 Some other genes such as *coaT* (*slr0797*), *cadA* (*slr0798*), *ssl3044*, *sll0825*, *sll0423*,  
545 *tRNA-Ile*, *sll1514*, *sll0846*, and *RS15850* were also suppressed by exogenously generated  $^1\text{O}_2$   
546 in a His-reversible way, but at the same time were induced by HL, showing a tendency for  
547 His reversibility. This apparently contradicting behaviour can probably be explained by a  
548 damaging effect of externally generated  $^1\text{O}_2$ , which has a higher rate than that induced by HL  
549 alone and reverses the HL-induced upregulation of these genes. It is, however, unclear why  
550 only few of the  $^1\text{O}_2$ -responsive genes show this effect.

551

## 552 **$^1\text{O}_2$ -related signal transduction pathways**

553 Due to the short lifetime of  $^1\text{O}_2$ , it is very likely that the sensor for  $^1\text{O}_2$  is  
554 located in close proximity to the source of  $^1\text{O}_2$  in the thylakoids. Possible candidates in  
555 *Chlamydomonas* could be the degradation products of the D1 protein, or lipid peroxides  
556 (Fischer *et al.*, 2006). As regards the downstream elements of signal transduction, a small zinc  
557 finger protein METHYLENE BLUE SENSITIVITY (MBS) has been identified that is  
558 required for induction of  $^1\text{O}_2$ -dependent gene expression in *Chlamydomonas* (Shao *et al.*,  
559 2013). In *Chlamydomonas* a strong  $^1\text{O}_2$ -specific upregulation was also observed for the  
560 cytosolic glutathione peroxidase homolog gene (*GPXH/GPX5*) (Leisinger *et al.*, 2001; Fischer  
561 *et al.*, 2006; Ledford *et al.*, 2007). This effect was abolished by the deletion of the *psbP2*  
562 gene, which encodes a small protein that is similar to the PsbP subunit of the water-oxidizing

563 complex of PSII, and may act as a mediator of the signal from  $^1\text{O}_2$  generated in the  
564 chloroplast (Brzezowski *et al.*, 2012). It has also been shown that Chl precursors such as Mg-  
565 protoporphyrin IX can act as signaling molecules between chloroplasts and the nucleus  
566 (Strand *et al.*, 2003). By analogy, it can be assumed that Chl degradation products such as  
567 pheophytin, chlorophyllide or pheophorbide can act as signaling molecule (Krieger-Liszkay,  
568 2005).

569 In higher plants (*Arabidopsis*)  $\beta$ -carotene, residing in the PSII core complex, has also  
570 been suggested to act as a  $^1\text{O}_2$  sensor. In this model the  $^1\text{O}_2$ -specific endo-peroxides, such as  
571  $\beta$ -cyclocitral (Ramel *et al.*, 2012), which are highly reactive, volatile and electrophilic  
572 compounds produced via  $^1\text{O}_2$ -mediated oxidative modification of  $\beta$ -carotene can induce gene  
573 expression changes (Dogra & Kim, 2020). It has also been shown that the *Chlamydomonas*  
574 *METHYLENE BLUE SENSITIVITY (MBS)* gene has homologs in *Arabidopsis* (Shao *et al.*,  
575 2013), and one of them (*MBS1*) acts in  $^1\text{O}_2$  signaling downstream of  $\beta$ -cyclocitral (Shumbe *et*  
576 *al.*, 2017).

577 In *Arabidopsis* the so called EXECUTER1 and EXECUTER2 proteins are also implied  
578 as important mediators of  $^1\text{O}_2$ -induced gene expression (Keun *et al.*, 2007). According to  
579 more recent findings the Executer proteins may undergo structural modifications as a result of  
580  $^1\text{O}_2$  attack, which makes possible a proteolytic degradation and the production of smaller  
581 fragments that can serve as signaling components (Dogra & Kim, 2020). It has also been  
582 shown that the  $^1\text{O}_2$ -modified EXCUTER1 is degraded by the FtsH2 protease (Wang *et al.*,  
583 2016), which also plays a key role during PSII repair by degrading the D1 subunit of the PSII  
584 (Bailey *et al.*, 2002) whose photodamage also involves  $^1\text{O}_2$  (Mizusawa *et al.*, 2003; Vass,  
585 2012).

586 The best explored situation is in *Rhodobacter sphaeroides* and other bacteria, such as *E.*  
587 *coli*, where  $^1\text{O}_2$ -induced gene expression is controlled by the alternative group IV sigma factor  
588  $\sigma\text{E}$  (or RpoE) and its cognate anti-sigma ChrR. Under normal conditions RpoE and ChrR  
589 form a complex, which prevents RpoE from interacting with RNA polymerase. After  
590 interaction with  $^1\text{O}_2$  ChrR is degraded and releases RpoE that can induce gene expression  
591 (Anthony *et al.*, 2005; Campbell *et al.*, 2007; Nuss *et al.*, 2013). *Synechocystis* has two rpoE  
592 homologues, *sigH* (sll0856) and *sigG* (slr1545) (Huckauf *et al.*, 2000). However, the  
593 expression of these genes was not affected by  $^1\text{O}_2$  in our experiments in contrast to the  
594 response of *Rhodobacter rpoE*, which was strongly induced by  $^1\text{O}_2$  (Anthony *et al.*, 2005). So

595 far we could not find an obvious homolog of *chrR* in *Synechocystis*, therefore there is no  
596 obvious evidence for the presence of an RpoE-dependent  $^1\text{O}_2$  signaling pathway in  
597 *Synechocystis*.

598 It is of note, however, that among the 9 sigma factors of *Synechocystis* there was one,  
599 the Group-2 *sigD* (*sll2012*), which was induced by HL as well as RB and MB (Fig. 4 and 6).  
600 The SigD protein is involved in several stress responses, for example in regulation related to  
601 the Hik response regulators (Shoumskaya *et al.*, 2005; Los *et al.*, 2010). Induction of the *sigD*  
602 gene was partially suppressed by His in the case of HL, RB and MB (Supplementary Table 1).  
603 This finding strongly indicates that  $^1\text{O}_2$  is involved in the expression of *sigD*, which appears  
604 to be the only  $^1\text{O}_2$ -dependent sigma factor in *Synechocystis*. *sigD* expression has been shown  
605 to be upregulated by light (Imamura *et al.*, 2003), as well as by HL and heat stress (Turunen  
606 *et al.*, 2022), both of which can involve  $^1\text{O}_2$  formation (for heat-induced  $^1\text{O}_2$  formation see  
607 (Prasad *et al.*, 2016)), providing support for our finding. However, the deletion of *sigD* in  
608 *Synechocystis* did not eliminate the HL-induced upregulation of *hliB*, *lilA*, or *ssr2016* (coding  
609 for a hypothetical protein) (Turunen *et al.*, 2022), which are among the most strongly  $^1\text{O}_2$ -  
610 responsive genes according to our results. HL-induced *hliB*, *lilA*, or *ssr2016* expression was  
611 not affected by deleting *sigB*, *sigBCE* or *sigCDE* either (Turunen *et al.*, 2022), which shows  
612 that Group-2 sigma factors are unlikely to participate in  $^1\text{O}_2$ -dependent signaling in  
613 *Synechocystis*.

614 It is important to note that all *hli/scp* genes have the so-called High Light Regulatory 1  
615 (HLR1) element (Eriksson *et al.*, 2000) in their promoter regions (Kappell *et al.*, 2006), which  
616 is also present in some other high-light-inducible genes. Out of the 19 genes with known  
617 HLR1 elements (Eriksson *et al.*, 2000)(Cheregi & Funk, 2015) 17 were found to be  $^1\text{O}_2$ -  
618 responsive according to our data (*hliA-D*, *psbA2*, *nblA*, *sigD*, and the *sll1483*, *sll0157*,  
619 *slr0320*, *slr1687*, *ssl3044* and *ssl2162* genes encoding hypothetical proteins). Only *psbA3* and  
620 *slr1894* are absent from our data, which may be due to their low abundance under our  
621 conditions. It has also been shown that the factor that binds to the HLR1 motif upstream of  
622 the *hliB* gene is RpaB (*slr0947*), a response regulator (Kappell & Van Waasbergen, 2007),  
623 which is expected to modulate the function of the other genes containing HLR1 as well. The  
624 current model for the regulation through RpaB, in genes such as the *hli* family where HLR1 is  
625 located upstream of the core promoter region, is that under normal and low light conditions  
626 binding of the phosphorylated form of RpaB (RpaB-P) to HLR1 prevents the interaction of  
627 the core promoter with RNA polymerase. At high light intensities the sensory histidine kinase

628 Hik33 mediates dephosphorylation of RpaB-P, which facilitates the release of RpaB from the  
629 HLR1 motif leading to the de-repression of the genes (Hanaoka & Tanaka, 2008; Cheregi &  
630 Funk, 2015). Our data did not show any significant change in the abundance of *rpaB* mRNA  
631 in response to <sup>1</sup>O<sub>2</sub>. Therefore, one possibility for the <sup>1</sup>O<sub>2</sub>-induced upregulation of the *hli* and  
632 other genes having the HLR1 motif is that <sup>1</sup>O<sub>2</sub>-induced damage of the RpaB-P protein induces  
633 its release from HLR1, perhaps via a proteolytic degradation step as occurs in case of the  
634 ChrR anti-sigma factor in *Rhodobacter sphaeroides* (Nuss *et al.*, 2013). This effect could be  
635 independent of Hik33, since we did not observe a significant expression change of the gene  
636 encoding Hik33; however, other regulation pathways cannot be excluded either at the present  
637 stage of knowledge. Since the HLR1 motive is present only in a fraction of the <sup>1</sup>O<sub>2</sub>-inducible  
638 genes, the hypothesized RpaB-dependent regulatory mechanism cannot be a general way of  
639 regulating <sup>1</sup>O<sub>2</sub>-dependent gene expression, therefore extensive future studies will be needed to  
640 clarify the molecular basis of how <sup>1</sup>O<sub>2</sub> can regulate gene expression in *Synechocystis* and  
641 other cyanobacteria.

#### 642 **Competing interests**

643 None declared

#### 644 **Author contributions**

645 IV conceived the idea and conceptualized the study in collaboration with PBK. GP, PBK, IM  
646 and BH set up and performed the transcript profiling and RT PCR experiments. PBK, GM  
647 and GP analyzed the transcript changes. IM created the deletion mutants, GP created the  
648 bioreporter strain and performed the bioluminescence experiments. GP prepared the figures  
649 and wrote the first draft of the paper with in-depth suggestions from PBK. IV finalized the  
650 conclusions and the text of the paper. All the authors approved the final version of the  
651 manuscript.

652

653 **Funding:** This research was funded by the National Research, Development and Innovation  
654 Office, grant numbers K-116016 and K-132568

655

#### 656 **ORCID**

657 Imre Vass, <https://orcid.org/0000-0003-4987-7842>

658

659 **Data availability**

660 The data that support the findings of this study are openly available in Supporting  
661 Information.

662 **References**

663 **Akulinkina D V., Bolychevtseva Y V., Elanskaya I V., Karapetyan N V., Yurina**  
664 **NP. 2015.** Association of high light-inducible HliA/HliB stress proteins with photosystem I  
665 trimers and monomers of the cyanobacterium *Synechocystis* PCC 6803. *Biochemistry*  
666 (*Moscow*) **80**: 1254–1261.

667 **Anthony JR, Warczak KL, Donohue TJ. 2005.** A transcriptional response to singlet  
668 oxygen, a toxic byproduct of photosynthesis. *Proceedings of the National Academy of*  
669 *Sciences of the United States of America* **102**: 6502–6507.

670 **Aro EM, McCaffery S, Anderson JM. 1993.** Photoinhibition and D1 protein  
671 degradation in peas acclimated to different growth irradiances. *Plant Physiology* **103**: 835–  
672 843.

673 **Bailey S, Thompson E, Nixon PJ, Horton P, Mullineaux CW, Robinson C, Mann**  
674 **NH. 2002.** A critical role for the Var2 FtsH homologue of *Arabidopsis thaliana* in the  
675 photosystem II repair cycle in vivo. *Journal of Biological Chemistry* **277**: 2006–2011.

676 **Bashir F, Rehman AU, Szabó M, Vass I. 2021.** Singlet oxygen damages the function  
677 of Photosystem II in isolated thylakoids and in the green alga *Chlorella sorokiniana*.  
678 *Photosynthesis Research* **149**: 93–105.

679 **Berghoff BA, Glaeser J, Nuss AM, Zobawa M, Lottspeich F, Klug G. 2011.**  
680 Anoxygenic photosynthesis and photooxidative stress: A particular challenge for *Roseobacter*.  
681 *Environmental Microbiology* **13**: 775–791.

682 **Bhaya D, Dufresne A, Vaultot D, Grossman A. 2002.** Analysis of the hli gene family  
683 in marine and freshwater cyanobacteria. *FEMS Microbiology Letters* **215**: 209–219.

684 **Brzezowski P, Wilson KE, Gray GR. 2012.** The PSBP2 protein of *Chlamydomonas*  
685 *reinhardtii* is required for singlet oxygen-dependent signaling. : 1289–1303.



- 686           **Campbell EA, Greenwell R, Anthony JR, Wang S, Lim L, Das K, Sofia HJ,**  
687 **Donohue TJ, Darst SA. 2007.** A Conserved Structural Module Regulates Transcriptional  
688 Responses to Diverse Stress Signals in Bacteria. : 793–805.
- 689           **Chen J, Shi W, Li W, Chen G, Qin S. 2018.** Specific genetic variation in two non-  
690 motile substrains of the model cyanobacterium *Synechocystis* sp. PCC 6803. *Journal of*  
691 *Oceanology and Limnology* **36**: 2322–2332.
- 692           **Cheregi O, Funk C. 2015.** Regulation of the *scp* Genes in the Cyanobacterium  
693 *Synechocystis* sp. PCC 6803 What is New? *Molecules* **20**: 14621–14637.
- 694           **Daddy S, Zhan J, Jantaro S, He C, He Q, Wang Q. 2015.** A novel high light-  
695 inducible carotenoid-binding protein complex in the thylakoid membranes of *Synechocystis*  
696 PCC 6803. *Scientific Reports* **5**: 1–8.
- 697           **Dmitrieva VA, Tyutereva E V., Voitsekhovskaja O V. 2020.** Singlet oxygen in  
698 plants: Generation, detection, and signaling roles. *International Journal of Molecular*  
699 *Sciences* **21**.
- 700           **Dogra V, Kim C. 2020.** Singlet Oxygen Metabolism: From Genesis to Signaling.  
701 *Frontiers in Plant Science* **10**: 1–9.
- 702           **Eriksson J, Salih GF, Ghebramedhin H, Jansson C. 2000.** Deletion mutagenesis of  
703 the 5' *psbA2* region in *Synechocystis* 6803: Identification of a putative *cis* element involved  
704 in photoregulation. *Molecular Cell Biology Research Communications* **3**: 292–298.
- 705           **Ferretti U, Ciura J, Ksas B, Rác M, Sedlářová M, Kruk J, Havaux M, Pospíšil P.**  
706 **2018.** Chemical quenching of singlet oxygen by plastoquinols and their oxidation products in  
707 *Arabidopsis*. *Plant Journal* **95**: 848–861.
- 708           **Fischer BB, Dayer R, Wiesendanger M, Eggen RIL. 2007.** Independent regulation of  
709 the *GPXH* gene expression by primary and secondary effects of high light stress in  
710 *Chlamydomonas reinhardtii*. *Physiologia Plantarum* **130**: 195–206.
- 711           **Fischer BB, Eggen RIL, Trebst EA. 2006.** The glutathione peroxidase homologous  
712 gene *Gpxh* in *Chlamydomonas reinhardtii* is upregulated by singlet oxygen produced in  
713 photosystem II. : 583–590.
- 714           **Fischer BB, Hideg É, Krieger-Liszak A. 2013.** Production, Detection, and Signaling

715 of Singlet Oxygen in Photosynthetic Organisms. *Antioxidants & Redox Signaling* **18**: 2145–  
716 2162.

717 **Flors C, Fryer MJ, Waring J, Reeder B, Bechtold U, Mullineaux PM, Nonell S,**  
718 **Wilson MT, Baker NR. 2006.** Imaging the production of singlet oxygen in vivo using a new  
719 fluorescent sensor, Singlet Oxygen Sensor Green®. *Journal of Experimental Botany* **57**:  
720 1725–1734.

721 **Fufezan C, Gross CM, Sjödin M, Rutherford AW, Krieger-Liszakay A, Kirilovsky**  
722 **D. 2007.** Influence of the redox potential of the primary quinone electron acceptor on  
723 photoinhibition in photosystem II. *Journal of Biological Chemistry* **282**: 12492–12502.

724 **Funk C, Vermaas W. 1999.** A Cyanobacterial Gene Family Coding for Single-Helix  
725 Proteins Resembling Part of the Light-Harvesting Proteins from Higher Plants. *Biochemistry*  
726 **38**: 9397–9404.

727 **Gao F, Zhao J, Chen L, Battchikova N, Ran Z, Aro EM, Ogawa T, Ma W. 2016.**  
728 The NDH-1L-PSI supercomplex is important for efficient cyclic electron transport in  
729 cyanobacteria. *Plant Physiology* **172**: 1451–1464.

730 **Glaeser J, Nuss AM, Berghoff BA, Klug G. 2011.** *Singlet Oxygen Stress in*  
731 *Microorganisms*. Elsevier Ltd.

732 **Hanaoka M, Tanaka K. 2008.** Dynamics of RpaB-promoter interaction during high  
733 light stress, revealed by chromatin immunoprecipitation (ChIP) analysis in *Synechococcus*  
734 *elongatus* PCC 7942. *Plant Journal* **56**: 327–335.

735 **Havaux M, Guedeney G, He Q, Grossman AR. 2003.** Elimination of high-light-  
736 inducible polypeptides related to eukaryotic chlorophyll a/b-binding proteins results in  
737 aberrant photoacclimation in *Synechocystis* PCC6803. *Biochimica et Biophysica Acta -*  
738 *Bioenergetics* **1557**: 21–33.

739 **Havaux M, Hagemann M, Yeremenko N, Matthijs HCP, Jeanjean R. 2005.** The  
740 chlorophyll-binding protein IsiA is inducible by high light and protects the cyanobacterium  
741 *Synechocystis* PCC6803 from photooxidative stress. **579**: 2289–2293.

742 **He Q, Dolganov N, Björkman O, Grossman AR. 2001.** The high light-inducible  
743 polypeptides in *Synechocystis* PCC6803. Expression and function in high light. *Journal of*



744 *Biological Chemistry* **276**: 306–314.

745 **Hernández-Prieto MA, Semeniuk TA, Giner-Lamia J, Futschik ME. 2016.** The  
746 transcriptional landscape of the photosynthetic model cyanobacterium *Synechocystis* sp.  
747 PCC6803. *Scientific Reports* **6**: 1–15.

748 **Hideg É, Kós PB, Vass I. 2007.** Photosystem II damage induced by chemically  
749 generated singlet oxygen in tobacco leaves. *Physiologia Plantarum* **131**: 33–40.

750 **Hideg É, Spetea C, Vass I. 1994.** Singlet oxygen production in thylakoid membranes  
751 during photoinhibition as detected by EPR spectroscopy. *Photosynthesis Research* **39**: 191–  
752 199.

753 **Hihara Y, Kamei A, Kanehisa M, Kaplan A, Ikeuchi M. 2001.** DNA microarray  
754 analysis of cyanobacterial gene expression during acclimation to high light. *Plant Cell* **13**:  
755 793–806.

756 **Hsiao HY, He Q, Van Waasbergen LG, Grossman AR. 2004.** Control of  
757 photosynthetic and high-light-responsive genes by the histidine kinase DspA: Negative and  
758 positive regulation and interactions between signal transduction pathways. *Journal of*  
759 *Bacteriology* **186**: 3882–3888.

760 **Huckauf J, Nomura C, Forchhammer K, Hagemann M. 2000.** Stress responses of  
761 *Synechocystis* sp. strain PCC 6803 mutants impaired in genes encoding putative alternative  
762 sigma factors. *Microbiology* **146**: 2877–2889.

763 **Imamura S, Asayama M, Takahashi H, Tanaka K, Takahashi H, Shirai M. 2003.**  
764 Antagonistic dark/light-induced SigB/SigD, group 2 sigma factors, expression through redox  
765 potential and their roles in cyanobacteria. *FEBS Letters* **554**: 357–362.

766 **J. Sambrook, D.W. Russell. 2001.** *Molecular cloning* □: a laboratory manual, 3rd ed.,  
767 Cold Spring Harbor Laboratory Press, Cold Spring Harbor, N.Y.

768 **Järvi S, Suorsa M, Aro EM. 2015.** Photosystem II repair in plant chloroplasts -  
769 Regulation, assisting proteins and shared components with photosystem II biogenesis.  
770 *Biochimica et Biophysica Acta - Bioenergetics* **1847**: 900–909.

771 **Kanesaki Y, Suzuki I, Allakhverdiev SI, Mikami K, Murata N. 2002.** Salt stress and  
772 hyperosmotic stress regulate the expression of different sets of genes in *Synechocystis* sp.

- 773 PCC 6803. *Biochemical and Biophysical Research Communications* **290**: 339–348.
- 774 **Kappell AD, Bhaya D, Van Waasbergen LG. 2006.** Negative control of the high  
775 light-inducible hliA gene and implications for the activities of the NblS sensor kinase in the  
776 cyanobacterium *Synechococcus elongatus* strain PCC 7942. *Archives of Microbiology* **186**:  
777 403–413.
- 778 **Kappell AD, Van Waasbergen LG. 2007.** The response regulator RpaB binds the high  
779 light regulatory 1 sequence upstream of the high-light-inducible hliB gene from the  
780 cyanobacterium *Synechocystis* PCC 6803. *Archives of Microbiology* **187**: 337–342.
- 781 **Keun PL, Kim C, Landgraf F, Apel K. 2007.** EXECUTER1- and EXECUTER2-  
782 dependent transfer of stress-related signals from the plastid to the nucleus of *Arabidopsis*  
783 *thaliana*. *Proceedings of the National Academy of Sciences of the United States of America*  
784 **104**: 10270–10275.
- 785 **Kirtania P, Hódi B, Mallick I, Vass IZ, Fehér T, Vass I, Kós PB. 2019.** A single  
786 plasmid based CRISPR interference in *Synechocystis* 6803 – A proof of concept. *PLOS ONE*  
787 **14**: e0225375.
- 788 **Kodru S, ur Rehman A, Vass I. 2020.** Chloramphenicol enhances Photosystem II  
789 photodamage in intact cells of the cyanobacterium *Synechocystis* PCC 6803. *Photosynthesis*  
790 *Research* **145**: 227–235.
- 791 **Komenda J, Sobotka R. 2016.** Cyanobacterial high-light-inducible proteins -  
792 Protectors of chlorophyll-protein synthesis and assembly. *Biochimica et Biophysica Acta -*  
793 *Bioenergetics* **1857**: 288–295.
- 794 **Konert MM, Wysocka A, Koník P, Sobotka R. 2022.** High-light-inducible proteins  
795 HliA and HliB: pigment binding and protein–protein interactions. *Photosynthesis Research*.
- 796 **Krieger-Liszkay A. 2005.** Singlet oxygen  
797 production in photosynthesis. *Journal of Experimental Botany*, 56(411), 337–346.  
798 <https://doi.org/10.1093/jxb/erh237> production in photosynthesis. *Journal of*  
799 *Experimental Botany* **56**: 337–346.
- 800 **Krieger-Liszkay A, Fufezan C, Trebst A. 2008.** Singlet oxygen production in  
801 photosystem II and related protection mechanism. *Photosynthesis Research* **98**: 551–564.

- 802           **Kufryk G, Hernandez-Prieto MA, Kieselbach T, Miranda H, Vermaas W, Funk C.**  
803   **2008.** Association of small CAB-like proteins (SCPs) of *Synechocystis* sp. PCC 6803 with  
804   Photosystem II. *Photosynthesis Research* **95**: 135–145.
- 805           **Kunert A, Hagemann M, Erdmann N. 2000.** Construction of promoter probe vectors  
806   for *Synechocystis* sp. PCC 6803 using the light-emitting reporter systems Gfp and LuxAB.  
807   *Journal of Microbiological Methods* **41**: 185–194.
- 808           **Ledford HK, Chin BL, Niyogi KK. 2007.** Acclimation to Singlet Oxygen Stress in  
809   *Chlamydomonas reinhardtii* □. **6**: 919–930.
- 810           **Leisinger U, Rüfenacht K, Fischer B, Pesaro M, Spengler A, Zehnder AJB, Eggen**  
811   **RIL. 2001.** The glutathione peroxidase homologous gene from *Chlamydomonas reinhardtii* is  
812   transcriptionally up-regulated by singlet oxygen. *Plant Molecular Biology* **46**: 395–408.
- 813           **Lex A, Gehlenborg N, Strobel H, Vuillemot R, Pfister H. 2014.** UpSet:  
814   Visualization of intersecting sets. *IEEE Transactions on Visualization and Computer*  
815   *Graphics* **20**: 1983–1992.
- 816           **Liu J, Qiao J, Shao M, Chen L, Wang J, Wu G, Tian X, Huang S, Zhang W. 2013.**  
817   Systematic characterization of hypothetical proteins in *Synechocystis* sp. PCC 6803 reveals  
818   proteins functionally relevant to stress responses. *Gene* **512**: 6–15.
- 819           **Los DA, Zorina A, Sinetova M, Kryazhov S, Mironov K, Zinchenko V V. 2010.**  
820   Stress sensors and signal transducers in cyanobacteria. *Sensors* **10**: 2386–2415.
- 821           **Di Mascio P, Martinez GR, Miyamoto S, Ronsein GE, Medeiros MHG, Cadet J.**  
822   **2019.** Singlet Molecular Oxygen Reactions with Nucleic Acids, Lipids, and Proteins.  
823   *Chemical Reviews* **119**: 2043–2086.
- 824           **Michel KP, Pistorius EK. 2004.** Adaptation of the photosynthetic electron transport  
825   chain in cyanobacteria to iron deficiency: The function of IdiA and IsiA. *Physiologia*  
826   *Plantarum* **120**: 36–50.
- 827           **Mizusawa N, Tomo T, Satoh K, Miyao M. 2003.** Degradation of the D1 Protein of  
828   Photosystem II under Illumination in Vivo:□ Two Different Pathways Involving Cleavage or  
829   Intermolecular Cross-Linking. *Biochemistry* **42**: 10034–10044.
- 830           **Mohamed A, Eriksson J, Osiewacz HD, Jansson C. 1993.** Differential expression of

831 the psbA genes in the cyanobacterium *Synechocystis* 6803. *Molecular and General Genetics*  
832 *MGG* **238**: 161–168.

833 **Nishiyama Y, Allakhverdiev SI, Yamamoto H, Hayashi H, Murata N. 2004.** Singlet  
834 Oxygen Inhibits the Repair of Photosystem II by Suppressing the Translation Elongation of  
835 the D1 Protein in *Synechocystis* sp. PCC 6803. *Biochemistry* **43**: 11321–11330.

836 **Nixon PJ, Michoux F, Yu J, Boehm M, Komenda J. 2010.** Recent advances in  
837 understanding the assembly and repair of photosystem II. *Annals of Botany* **106**: 1–16.

838 **Nuss AM, Adnan F, Weber L, Berghoff BA, Glaeser J, Klug G. 2013.** DegS and  
839 RseP homologous proteases are involved in singlet oxygen dependent activation of RpoE in  
840 *Rhodobacter sphaeroides*. *PLoS ONE* **8**: 1–15.

841 **Ogawa K, Yoshikawa K, Matsuda F, Toya Y, Shimizu H. 2018.** Transcriptome  
842 analysis of the cyanobacterium *Synechocystis* sp. PCC 6803 and mechanisms of  
843 photoinhibition tolerance under extreme high light conditions. *Journal of Bioscience and*  
844 *Bioengineering* **126**: 596–602.

845 **Okada K, Ikeuchi M, Yamamoto N, Ono TA, Miyao M. 1996.** Selective and specific  
846 cleavage of the D1 and D2 proteins of Photosystem II by exposure to singlet oxygen: Factors  
847 responsible for the susceptibility to cleavage of the proteins. *Biochimica et Biophysica Acta -*  
848 *Bioenergetics* **1274**: 73–79.

849 **Op Den Camp RGL, Przybyla D, Ochsenein C, Laloi C, Kim C, Danon A,**  
850 **Wagner D, Hideg É, Göbel C, Feussner I, et al. 2003.** Rapid Induction of Distinct Stress  
851 Responses after the Release of Singlet Oxygen in *Arabidopsis*. *Plant Cell* **15**: 2320–2332.

852 **Page MT, McCormac AC, Smith AG, Terry MJ. 2017.** Singlet oxygen initiates a  
853 plastid signal controlling photosynthetic gene expression. *New Phytologist* **213**: 1168–1180.

854 **Patyi G, Hódi B, Solymosi D, Vass I, Kós PB. 2021.** Increased sensitivity of heavy  
855 metal bioreporters in transporter deficient *Synechocystis* PCC6803 mutants. *Plos One* **16**:  
856 e0261135.

857 **Peca L, Kós PB, Máté Z, Farsang A, Vass I. 2008.** Construction of bioluminescent  
858 cyanobacterial reporter strains for detection of nickel, cobalt and zinc. *FEMS Microbiology*  
859 *Letters* **289**: 258–264.

- 860           **Peca L, Kós PB, Vass I. 2007.** Characterization of the activity of heavy metal-  
861 responsive promoters in the cyanobacterium *Synechocystis* PCC 6803. *Acta Biologica*  
862 *Hungarica* **58**: 11–22.
- 863           **Peca L, Nagy CI, Órdog A, Vass I, Kós PB. 2017.** Development of a bioluminescent  
864 cyanobacterial reporter strain for detection of arsenite, arsenate and antimonite.  
865 *Environmental Engineering and Management Journal* **16**: 2443–2450.
- 866           **Pospíšil P, Kumar A, Prasad A. 2022.** Reactive oxygen species in photosystem II:  
867 relevance for oxidative signaling. *Photosynthesis Research* **152**: 245–260.
- 868           **Prasad A, Ferretti U, Sedlaová M, Pospíšil P. 2016.** Singlet oxygen production in  
869 *Chlamydomonas reinhardtii* under heat stress. *Scientific Reports* **6**: 1–13.
- 870           **Promnares K, Komenda J, Bumba L, Nebesarova J, Vacha F, Tichy M. 2006.**  
871 Cyanobacterial small chlorophyll-binding protein ScpD (HliB) is located on the periphery of  
872 photosystem II in the vicinity of PsbH and CP47 subunits. *Journal of Biological Chemistry*  
873 **281**: 32705–32713.
- 874           **Ramel F, Birtic S, Ginies C, Soubigou-taconnat L, Triantaphylidès C. 2012.**  
875 Carotenoid oxidation products are stress signals that mediate gene responses to singlet oxygen  
876 in plants. **109**.
- 877           **Rehman AU, Cser K, Sass L, Vass I. 2013.** Characterization of singlet oxygen  
878 production and its involvement in photodamage of Photosystem II in the cyanobacterium  
879 *Synechocystis* PCC 6803 by histidine-mediated chemical trapping. *Biochimica et Biophysica*  
880 *Acta - Bioenergetics* **1827**: 689–698.
- 881           **Riethman H, Bullerjahn G, Reddy KJ, Sherman LA. 1988.** Regulation of  
882 cyanobacterial pigment-protein composition and organization by environmental factors.  
883 *Photosynthesis research* **18**: 133–161.
- 884           **Rippka R, Deruelles J, Waterbury JB. 1979.** Generic assignments, strain histories  
885 and properties of pure cultures of cyanobacteria. *Journal of General Microbiology* **111**: 1–61.
- 886           **Shao N, Duan GY, Bock R, Molekulare M. 2013.** A Mediator of Singlet Oxygen  
887 Responses in *Chlamydomonas reinhardtii* and *Arabidopsis* Identified by a Luciferase-Based  
888 Genetic Screen in Algal Cells. **25**: 4209–4226.

- 889           **Shoumskaya MA, Paithoonrangarid K, Kanasaki Y, Los DA, Zinchenko V V.,**  
890 **Tanticharoen M, Suzuki I, Murata N. 2005.** Identical Hik-Rre systems are involved in  
891 perception and transduction of salt signals and hyperosmotic signals but regulate the  
892 expression of individual genes to different extents in *Synechocystis*. *Journal of Biological*  
893 *Chemistry* **280**: 21531–21538.
- 894           **Shumbe L, Alessandro SD, Shao N, Chevalier A, Ksas B, Bock R, Havaux M,**  
895 **Cadarache CEA, Umr C, Université A, et al. 2017.** Original Article METHYLENE BLUE  
896 SENSITIVITY 1 ( MBS1 ) is required for acclimation of *Arabidopsis* to singlet oxygen and  
897 acts downstream of  $\beta$  -cyclocitral. **1**: 216–226.
- 898           **Silva P, Thompson E, Bailey S, Kruse O, Mullineaux CW, Robinson C, Mann NH,**  
899 **Nixon PJ. 2003.** FtsH is involved in the early stages of repair of photosystem II in  
900 *Synechocystis* sp PCC 6803. *The Plant cell* **15**: 2152–2164.
- 901           **Sinha RK, Komenda J, Knoppová J, Sedlářová M, Pospíšil P. 2012.** Small CAB-like  
902 proteins prevent formation of singlet oxygen in the damaged photosystem II complex of the  
903 cyanobacterium *Synechocystis* sp. PCC 6803. *Plant, Cell and Environment* **35**: 806–818.
- 904           **Strand A, Asami T, Ecker JR. 2003.** Chloroplast communication triggered by  
905 accumulation of Mg-protoporphyrin. *Nature* **421**: 79–83.
- 906           **Tomo T, Kusakabe H, Nagao R, Ito H, Tanaka A, Akimoto S, Mimuro M, Okazaki**  
907 **S. 2012.** Luminescence of singlet oxygen in photosystem II complexes isolated from  
908 cyanobacterium *Synechocystis* sp. PCC6803 containing monovinyl or divinyl chlorophyll a.  
909 *Biochimica et Biophysica Acta - Bioenergetics* **1817**: 1299–1305.
- 910           **Turunen O, Koskinen S, Kurkela J, Karhuvaara O, Hakkila K, Tyystjärvi T. 2022.**  
911 Roles of Close Homologues SigB and SigD in Heat and High Light Acclimation of the  
912 Cyanobacterium *Synechocystis* sp. PCC 6803. *Life* **12**.
- 913           **Vass I. 2012.** *Biochimica et Biophysica Acta* Molecular mechanisms of photodamage in  
914 the Photosystem II complex. *BBA - Bioenergetics* **1817**: 209–217.
- 915           **Vass I, Cser K. 2009.** Janus-faced charge recombinations in photosystem II  
916 photoinhibition. *Trends in Plant Science* **14**: 200–205.
- 917           **Wang L, Kim C, Xu X, Piskurewicz U, Dogra V, Singh S, Mahler H, Apel K. 2016.**

918 Singlet oxygen- and EXECUTER1-mediated signaling is initiated in grana margins and  
919 depends on the protease FtsH2. *Proceedings of the National Academy of Sciences of the*  
920 *United States of America* **113**: E3792–E3800.

921 **Zavafer A. 2021.** A theoretical framework of the hybrid mechanism of photosystem II  
922 photodamage. *Photosynthesis Research* **149**: 107–120.

923

924 **Supporting Information (brief legends)**

925 S1 file: Selected transcript table

926 S2 file: Full transcript table

927
